# Supplementary material for: Facile synthesis of benzofurans via copper-catalyzed aerobic oxidative cyclization of phenols and alkynes
Source: Royal Society of Chemistry journal article supplement (doi:10.1039/c3cc42326c), 2013-01-01
Supplement: c3cc42326c.pdf [file c3cc42326c.pdf]

# Supporting Information

## Facile Synthesis of Benzofurans via Copper-Catalyzed Aerobic Oxidative Cyclization of Phenols and Alkynes

Wei Zeng, Wanqing Wu, Huanfeng Jiang, \* Liangbin Huang, Yadong Sun, Zhengwang  
Chen and Xianwei Li

School of Chemistry and Chemical Engineering, South China University of Technology,  
Guangzhou 510640, China

*E-mail: jianghf@scut.edu.cn; Fax and Tel.: (+86) 20-87112906*

### *Table of Contents for Supporting Information*

|                                                                                    |   |
|------------------------------------------------------------------------------------|---|
| General Information.....                                                           | 2 |
| Typical procedure for the copper-catalyzed reaction of 2,3-diphenylbenzofuran..... | 2 |
| Analytical Data .....                                                              | 2 |
| NMR Spectra .....                                                                  | 7 |

## General Information

$^1\text{H}$  and  $^{13}\text{C}$  NMR spectra were recorded on a Bruker Advance 400 spectrometer ( $^1\text{H}$ : 400 MHz,  $^{13}\text{C}$ : 100 MHz). The chemical shifts were referenced to signals at 7.26 and 77.0 ppm, respectively. The following abbreviations were used to explain the multiplicities: s = singlet, d = doublet, t = triplet, q = quartet, m = multiplet. Mass spectra were recorded on a Shimadzu GCMS-QP5050A spectrometer at an ionization voltage of 70 eV equipped with a DB-WAX capillary column (internal diameter: 0.25 mm, length: 30 m). Elemental analyses were performed with a Vario EL elemental analyzer. GC-MS was obtained using electron ionization. Melting point was recorded with Buchi Melting Point B-545.

## Typical procedure for the copper-catalyzed reaction of 2,3-Diphenylbenzofuran

In a 20 mL Schlenk tube was charged with phenol (1.5 mmol), 1,2-diphenylethyne (1.0 mmol),  $\text{ZnCl}_2$  (1.5 eq),  $\text{Cu}(\text{OTf})_2$  (10% mol) and  $\text{PhNO}_2$  (2 mL) under  $\text{O}_2$  (filled with a balloon) atmosphere. The resulting mixture was heated at 120 °C, and the reaction was allowed to stir for the time specified (24 h). After reaction completion, as monitored by TLC and GC-MS analysis, the mixture was washed with brine and extracted with ethyl acetate. The organic layer was dried ( $\text{MgSO}_4$ ), concentrated in vacuum and purified by flash silica gel chromatography using pure *n*-hexane to give the desired products.

## Analytical Data

### 2,3-Diphenylbenzofuran (3a)

Yellow oil,  $^1\text{H}$  NMR (400 MHz,  $\text{CDCl}_3$ )  $\delta$  = 7.65-7.67 (m, 2H), 7.55 (d,  $J$  = 8.0Hz, 1H), 7.44-7.51(m, 5H), 7.38-7.41 (m, 1H), 7.28-7.34 (m, 4H), 7.23 (t,  $J$  = 8.0Hz, 1H).  $^{13}\text{C}$  NMR (100 MHz,  $\text{CDCl}_3$ )  $\delta$  = 154.0, 150.6, 132.9, 130.7, 130.3, 129.8, 129.0, 128.4, 128.4, 127.7, 127.1, 124.7, 122.9, 120.1, 117.5, 111.1. MS (EI)  $m/z$ : 270, 239, 215, 189, 165, 134. Anal. Calcd for  $\text{C}_{20}\text{H}_{14}\text{O}$ : C, 88.86; H, 5.22. Found: C, 88.79; H, 5.24.

### 5-Methyl-2,3-diphenylbenzofuran (3b)

Yellow oil,  $^1\text{H}$  NMR (400 MHz,  $\text{CDCl}_3$ )  $\delta$  = 7.63-7.64 (m, 2H), 7.36-7.48 (m, 6H), 7.24-7.26 (m, 4H), 7.09-7.11 (m, 1H), 2.38 (s, 3H).  $^{13}\text{C}$  NMR (100 MHz,  $\text{CDCl}_3$ )  $\delta$  = 152.6, 150.8, 133.2, 132.5, 130.9, 130.5, 129.9, 129.1, 128.5, 128.3, 127.7, 127.1, 126.1, 119.9, 117.5, 110.7, 21.5. MS (EI)  $m/z$ : 284, 269, 255, 239, 226. Anal. Calcd for  $\text{C}_{21}\text{H}_{16}\text{O}$ : C, 88.70; H, 5.67. Found: C, 88.66; H, 5.69.

### 5-Methoxy-2,3-diphenylbenzofuran (3c)

Yellow solid, mp: 80-81 °C,  $^1\text{H}$  NMR (400 MHz,  $\text{CDCl}_3$ )  $\delta$  = 7.61 (d,  $J$  = 8.0Hz, 2H), 7.39-7.49 (m, 6H), 7.26-7.28 (m, 3H), 6.91-6.93 (m, 2H), 3.78 (s, 3H).  $^{13}\text{C}$  NMR (100 MHz,  $\text{CDCl}_3$ )  $\delta$  = 156.3, 151.4, 149.1, 133.0, 130.8, 130.8, 129.8, 129.1, 128.4, 128.3, 127.7, 127.0, 117.8, 113.6, 111.7,

102.3, 56.0. MS (EI)  $m/z$ : 300, 257, 239, 228, 202. Anal. Calcd for  $C_{21}H_{16}O_2$ : C, 83.98; H, 5.37. Found: C, 83.94; H, 5.39.

#### 5-Isopropyl-2,3-diphenylbenzofuran (3d)

Yellow oil,  $^1H$  NMR (400 MHz,  $CDCl_3$ )  $\delta$  = 7.62-7.64 (m, 2H), 7.43-7.51 (m, 5H), 7.37-7.39 (m, 1H), 7.24-7.32 (m, 4H), 7.18-7.20 (m, 1H), 2.93-3.01 (m, 1H), 1.27 (d,  $J$  = 7.2Hz, 3H), 1.25 (d,  $J$  = 7.2Hz, 3H).  $^{13}C$  NMR (100 MHz,  $CDCl_3$ )  $\delta$  = 152.8, 150.9, 144.0, 133.2, 131.0, 130.3, 130.0, 129.1, 128.5, 128.3, 127.7, 127.1, 123.6, 117.7, 117.2, 110.9, 34.4, 24.7. MS (EI)  $m/z$ : 312, 297, 269, 239, 226. Anal. Calcd for  $C_{23}H_{20}O$ : C, 88.43; H, 6.45. Found: C, 88.40; H, 6.46.

#### 5-Fluoro-2,3-diphenylbenzofuran (3e)

White solid, mp: 117-118°C,  $^1H$  NMR (400 MHz,  $CDCl_3$ )  $\delta$  = 7.62-7.64 (m, 2H), 7.38-7.46 (m, 6H), 7.28-7.31 (m, 3H), 7.12-7.14 (m, 1H), 6.99-7.04 (m, 1H).  $^{13}C$  NMR (100 MHz,  $CDCl_3$ )  $\delta$  = 159.6 (d,  $J_{C,F}$  = 237.1Hz), 151.3 (d,  $J_{C,F}$  = 237.1Hz), 132.4, 131.2 (d,  $J_{C,F}$  = 10.3Hz), 130.4, 129.6, 129.1, 128.7, 128.5, 127.9, 127.1, 116.2 (d,  $J_{C,F}$  = 23.0Hz), 117 (d,  $J_{C,F}$  = 4.0Hz), 112.3 (d,  $J_{C,F}$  = 26.3Hz), 111.7 (d,  $J_{C,F}$  = 9.4Hz), 105.6 (d,  $J_{C,F}$  = 25.2Hz). MS (EI)  $m/z$ : 288, 273, 259, 239. Anal. Calcd for  $C_{20}H_{13}FO$ : C, 83.32; H, 4.54. Found: C, 83.30; H, 4.55.

#### 5-Chloro-2,3-diphenylbenzofuran (3f)

Orange solid, mp: 113-114°C,  $^1H$  NMR (400 MHz,  $CDCl_3$ )  $\delta$  = 7.61-7.64 (m, 2H), 7.40-7.46 (m, 7H), 7.24-7.29 (m, 4H).  $^{13}C$  NMR (100 MHz,  $CDCl_3$ )  $\delta$  = 152.4, 152.0, 132.2, 131.7, 130.2, 129.7, 129.2, 128.5, 128.0, 127.1, 124.9, 119.7, 117.2, 112.1. MS (EI)  $m/z$ : 304, 289, 268, 239, 226. Anal. Calcd for  $C_{20}H_{13}ClO$ : C, 78.82; H, 4.30. Found: C, 78.79; H, 4.31.

#### 5-Bromo-2,3-diphenylbenzofuran (3g)

Yellow solid, mp: 134-135°C,  $^1H$  NMR (400 MHz,  $CDCl_3$ )  $\delta$  = 7.58-7.63 (m, 3H), 7.42-7.45 (m, 4H), 7.38-7.41 (m, 3H), 7.28-7.29 (m, 3H).  $^{13}C$  NMR (100 MHz,  $CDCl_3$ )  $\delta$  = 152.8, 151.8, 132.3, 132.2, 130.2, 129.7, 129.2, 128.8, 128.5, 128.0, 127.6, 127.1, 122.7, 117.0, 116.2, 112.6. MS (EI)  $m/z$ : 348, 268, 239, 213, 189. Anal. Calcd for  $C_{20}H_{13}BrO$ : C, 68.79; H, 3.75. Found: C, 68.76; H, 3.76.

#### 5-Iodo-2,3-diphenylbenzofuran (3h)

White solid, mp: 166-167°C,  $^1H$  NMR (400 MHz,  $CDCl_3$ )  $\delta$  = 7.79 (m, 3H), 7.58-7.64 (m, 3H), 7.42-7.48 (m, 5H), 7.30-7.33 (m, 4H).  $^{13}C$  NMR (100 MHz,  $CDCl_3$ )  $\delta$  = 153.4, 151.4, 133.2, 133.0, 132.1, 130.1, 129.7, 129.2, 128.8, 128.8, 128.5, 128.0, 127.1, 116.7, 113.2, 86.5. MS (EI)  $m/z$ : 396, 268, 239, 226, 213. Anal. Calcd for  $C_{20}H_{13}IO$ : C, 60.63; H, 3.31. Found: C, 60.61; H, 3.32.

#### 5-Chloro-4,6-dimethyl-2,3-diphenylbenzofuran (3i)

Light orange solid, mp: 130-131°C,  $^1H$  NMR (400 MHz,  $CDCl_3$ )  $\delta$  = 7.40-7.44 (m, 5H), 7.34-7.36 (m, 2H), 7.22 (m, 1H), 7.17-7.18 (m, 1H), 2.45 (s, 3H), 2.03 (s, 3H).  $^{13}C$  NMR (100 MHz,  $CDCl_3$ )  $\delta$  = 152.0, 150.7, 134.4, 133.0, 130.9, 130.7, 130.0, 130.0, 129.0, 128.4, 128.1, 128.1, 127.8, 126.5, 118.4, 110.5, 21.9, 16.2. MS (EI)  $m/z$ : 332, 297, 281, 252, 239. Anal. Calcd for  $C_{22}H_{17}ClO$ : C, 79.39; H, 5.15. Found: C, 79.35; H, 5.16.

### 7-Chloro-2,3-diphenylbenzofuran (3j)

Brown oil,  $^1\text{H}$  NMR (400 MHz,  $\text{CDCl}_3$ )  $\delta$  = 7.72-7.75 (m, 2H), 7.47-7.53 (m, 5H), 7.41-7.43 (m, 1H), 7.36-7.37 (m, 4H), 7.20 (t,  $J$  = 8.0Hz, 1H).  $^{13}\text{C}$  NMR (100 MHz,  $\text{CDCl}_3$ )  $\delta$  = 151.5, 149.8, 132.3, 131.9, 130.1, 129.7, 129.1, 128.8, 128.5, 127.9, 127.2, 124.8, 123.8, 118.6, 118.0, 116.7. MS (EI)  $m/z$ : 304, 289, 268, 239, 226. Anal. Calcd for  $\text{C}_{20}\text{H}_{13}\text{ClO}$ : C, 78.82; H, 4.30. Found: C, 78.80; H, 4.31.

### 7-Bromo-2,3-diphenylbenzofuran (3k)

Yellow oil,  $^1\text{H}$  NMR (400 MHz,  $\text{CDCl}_3$ )  $\delta$  = 7.67-7.70 (m, 2H), 7.46-7.48 (m, 5H), 7.40-7.42 (m, 2H), 7.30-7.32 (m, 3H), 7.10 (t,  $J$  = 8.0Hz, 1H).  $^{13}\text{C}$  NMR (100 MHz,  $\text{CDCl}_3$ )  $\delta$  = 151.4, 151.2, 132.4, 131.6, 130.1, 129.7, 129.1, 128.8, 128.5, 127.9, 127.6, 127.2, 124.2, 119.2, 118.1, 104.0. MS (EI)  $m/z$ : 348, 268, 239, 213, 189. Anal. Calcd for  $\text{C}_{20}\text{H}_{13}\text{BrO}$ : C, 68.79; H, 3.75. Found: C, 68.77; H, 3.75.

### 7-Methyl-2,3-diphenylbenzofuran (3l)

Yellow oil,  $^1\text{H}$  NMR (400 MHz,  $\text{CDCl}_3$ )  $\delta$  = 7.66-7.67 (m, 2H), 7.48-7.49 (m, 2H), 7.43 (t,  $J$  = 8.0Hz, 2H), 7.37-7.38 (m, 1H), 7.25-7.32 (m, 4H), 7.11-7.13 (m, 2H), 2.60 (s, 3H).  $^{13}\text{C}$  NMR (100 MHz,  $\text{CDCl}_3$ )  $\delta$  = 153.1, 150.3, 133.2, 131.0, 129.9, 129.8, 129.0, 128.5, 128.3, 127.6, 127.1, 125.7, 123.1, 121.4, 117.9, 117.6, 15.1. MS (EI)  $m/z$ : 284, 269, 255, 239, 226. Anal. Calcd for  $\text{C}_{21}\text{H}_{16}\text{O}$ : C, 88.70; H, 5.67. Found: C, 88.68; H, 5.68.

### 4-Isopropyl-7-methyl-2,3-diphenylbenzofuran (3m)

Light yellow solid, mp: 98-99°C,  $^1\text{H}$  NMR (400 MHz,  $\text{CDCl}_3$ )  $\delta$  = 7.44-7.48 (m, 7H), 7.20-7.24 (m, 3H), 7.43 (t,  $J$  = 8.0Hz, 2H), 7.10 (d,  $J$  = 8.0Hz, 1H), 7.06 (t,  $J$  = 8.0Hz, 1H), 2.82-2.89 (m, 1H), 2.59 (s, 3H), 1.03 (s, 3H), 1.01 (s, 3H).  $^{13}\text{C}$  NMR (100 MHz,  $\text{CDCl}_3$ )  $\delta$  = 152.6, 150.1, 141.3, 135.2, 131.1, 130.6, 129.5, 128.8, 128.3, 127.9, 127.8, 126.5, 125.7, 119.2, 118.6, 118.4, 27.5, 23.9, 14.8. MS (EI)  $m/z$ : 326, 311, 296, 281, 252. Anal. Calcd for  $\text{C}_{24}\text{H}_{22}\text{O}$ : C, 88.31; H, 6.79. Found: C, 88.27; H, 6.80.

### 5-(Methylthio)-2,3-diphenylbenzofuran (3n)

Yellow solid, mp: 105-106°C,  $^1\text{H}$  NMR (400 MHz,  $\text{CDCl}_3$ )  $\delta$  = 7.62-7.64 (m, 2H), 7.46-7.48 (m, 5H), 7.42-7.44 (m, 2H), 7.29-7.32 (m, 4H), 2.48 (s, 3H).  $^{13}\text{C}$  NMR (100 MHz,  $\text{CDCl}_3$ )  $\delta$  = 152.7, 151.3, 132.6, 132.1, 131.1, 130.5, 129.8, 129.1, 128.5, 128.5, 127.8, 127.0, 125.7, 119.8, 117.1, 111.6, 18.1. MS (EI)  $m/z$ : 316, 301, 283, 268, 239. Anal. Calcd for  $\text{C}_{21}\text{H}_{16}\text{OS}$ : C, 79.71; H, 5.10. Found: C, 79.69; H, 5.12.

### 2,3-Diphenylnaphtho[1,2-*b*]furan (3o)

Yellow solid, mp: 94-95°C,  $^1\text{H}$  NMR (400 MHz,  $\text{CDCl}_3$ )  $\delta$  = 8.42 (d,  $J$  = 8.0Hz, 1H), 7.93 (d,  $J$  = 8.0Hz, 1H), 7.74 (d,  $J$  = 8.0Hz, 2H), 7.61-7.66 (m, 2H), 7.54-7.56 (m, 3H), 7.47-7.51 (m, 3H), 7.42-7.44 (m, 1H), 7.29-7.36 (m, 3H).  $^{13}\text{C}$  NMR (100 MHz,  $\text{CDCl}_3$ )  $\delta$  = 150.1, 149.5, 133.0, 131.8, 131.0, 129.9, 129.0, 128.5, 128.4, 128.1, 127.7, 126.8, 126.4, 125.6, 125.3, 123.6, 121.3, 120.2, 118.6, 118.5. MS (EI)  $m/z$ : 320, 291, 289, 276. Anal. Calcd for  $\text{C}_{24}\text{H}_{16}\text{O}$ : C, 89.97; H, 5.03. Found: C, 89.94; H, 5.04.

### 2,3,7-Triphenylbenzofuran (3p)

Brown solid, mp: 92-93°C,  $^1\text{H}$  NMR (400 MHz,  $\text{CDCl}_3$ )  $\delta$  = 7.96-7.98 (m, 2H), 7.65-7.67 (m, 2H), 7.46-7.56 (m, 8H), 7.42-7.45 (m, 2H), 7.28-7.33 (m, 4H).  $^{13}\text{C}$  NMR (100 MHz,  $\text{CDCl}_3$ )  $\delta$  = 151.2, 150.7, 136.6, 132.9, 131.2, 130.6, 129.9, 128.7, 128.5, 128.4, 127.7, 127.7, 127.0, 125.3, 124.3, 123.6, 119.2, 117.7. MS (EI)  $m/z$ : 346, 331, 317, 302, 289. Anal. Calcd for  $\text{C}_{24}\text{H}_{18}\text{O}$ : C, 90.14; H, 5.24. Found: C, 90.13; H, 5.25.

### 2,3-Di-*m*-tolylbenzofuran (4a)

Yellow oil,  $^1\text{H}$  NMR (400 MHz,  $\text{CDCl}_3$ )  $\delta$  = 7.48-7.56 (m, 3H), 7.40-7.41 (m, 1H), 7.29-7.33 (m, 4H), 7.13-7.23 (m, 3H), 7.07-7.09 (m, 1H), 2.37 (s, 3H), 2.30 (s, 3H).  $^{13}\text{C}$  NMR (100 MHz,  $\text{CDCl}_3$ )  $\delta$  = 154.0, 150.7, 138.6, 138.1, 132.9, 130.7, 130.5, 130.4, 129.2, 128.9, 128.4, 128.3, 127.6, 127.0, 124.6, 124.3, 122.9, 120.1, 117.6, 111.1, 21.5. MS (EI)  $m/z$ : 298, 282, 268, 255, 239. Anal. Calcd for  $\text{C}_{22}\text{H}_{18}\text{O}$ : C, 88.56; H, 6.08. Found: C, 88.53; H, 6.10.

### 2,3-Bis(2-chlorophenyl)benzofuran (4b)

Yellow oil,  $^1\text{H}$  NMR (400 MHz,  $\text{CDCl}_3$ )  $\delta$  = 7.58 (d,  $J$  = 8.0Hz, 1H), 7.46 (d,  $J$  = 8.0Hz, 2H), 7.34-7.41 (m, 3H), 7.25-7.28 (m, 4H), 7.18-7.22 (m, 2H).  $^{13}\text{C}$  NMR (100 MHz,  $\text{CDCl}_3$ )  $\delta$  = 154.5, 150.4, 134.3, 134.1, 132.3, 132.2, 131.5, 130.4, 130.3, 130.0, 129.9, 129.2, 128.7, 126.8, 126.6, 124.9, 122.9, 121.0, 118.1, 111.5. MS (EI)  $m/z$ : 340, 302, 268, 239, 213. Anal. Calcd for  $\text{C}_{20}\text{H}_{12}\text{Cl}_2\text{O}$ : C, 70.81; H, 3.57. Found: C, 70.78; H, 3.58.

### 2,3-Bis(4-butylphenyl)benzofuran (4c)

Yellow oil,  $^1\text{H}$  NMR (400 MHz,  $\text{CDCl}_3$ )  $\delta$  = 7.56 (d,  $J$  = 8.0Hz, 2H), 7.52 (d,  $J$  = 8.0Hz, 1H), 7.48 (d,  $J$  = 8.0Hz, 1H), 7.39-7.41 (m, 2H), 7.19-7.31 (m, 4H), 7.11 (d,  $J$  = 8.0Hz, 2H), 2.68 (t,  $J$  = 8.0Hz, 2H), 2.59 (t,  $J$  = 8.0Hz, 2H), 1.64-1.72 (m, 2H), 1.55-1.63 (m, 2H), 1.40-1.47 (m, 2H), 1.31-1.38 (m, 2H), 0.97 (t,  $J$  = 7.6Hz, 3H), 0.92 (t,  $J$  = 7.6Hz, 3H).  $^{13}\text{C}$  NMR (100 MHz,  $\text{CDCl}_3$ )  $\delta$  = 153.9, 150.7, 143.3, 142.2, 130.6, 130.1, 129.6, 128.9, 128.5, 128.2, 126.9, 124.4, 122.7, 120.0, 116.9, 111.0, 35.5, 35.5, 33.6, 33.4, 22.5, 22.4, 14.0, 14.0. MS (EI)  $m/z$ : 382, 339, 297, 281, 252. Anal. Calcd for  $\text{C}_{28}\text{H}_{30}\text{O}$ : C, 87.91; H, 7.90. Found: C, 87.78; H, 7.92.

### 2,3-Bis(4-fluorophenyl)benzofuran (4d)

Yellow oil,  $^1\text{H}$  NMR (400 MHz,  $\text{CDCl}_3$ )  $\delta$  = 7.58-7.62 (m, 2H), 7.53 (d,  $J$  = 8.0Hz, 1H), 7.42-7.45 (m, 3H), 7.31-7.35 (m, 1H), 7.22-7.26 (m, 1H), 7.14-7.18 (m, 2H), 6.99-7.03 (m, 2H).  $^{13}\text{C}$  NMR (100 MHz,  $\text{CDCl}_3$ )  $\delta$  = 162.7 (d,  $J_{\text{C,F}}$  = 247.8Hz), 162.4 (d,  $J_{\text{C,F}}$  = 245.7Hz), 153.9, 149.8, 131.4 (d,  $J_{\text{C,F}}$  = 7.9Hz), 130.1, 128.9 (d,  $J_{\text{C,F}}$  = 8.1Hz), 128.6 (d,  $J_{\text{C,F}}$  = 3.4Hz), 126.7 (d,  $J_{\text{C,F}}$  = 3.4Hz), 124.9, 123.1, 119.8, 116.3, 116.2 (d,  $J_{\text{C,F}}$  = 21.3Hz), 115.6 (d,  $J_{\text{C,F}}$  = 21.7Hz), 111.2. MS (EI)  $m/z$ : 306, 277, 274, 257, 251. Anal. Calcd for  $\text{C}_{20}\text{H}_{12}\text{F}_2\text{O}$ : C, 78.42; H, 3.95. Found: C, 78.40; H, 3.96.

### 2,3-Bis(3-chlorophenyl)benzofuran (4e)

Yellow oil,  $^1\text{H}$  NMR (400 MHz,  $\text{CDCl}_3$ )  $\delta$  = 7.69 (m, 1H), 7.52-7.54 (m, 1H), 7.38-7.49 (m, 5H), 7.32-7.36 (m, 2H), 7.18-7.26 (m, 3H).  $^{13}\text{C}$  NMR (100 MHz,  $\text{CDCl}_3$ )  $\delta$  = 154.0, 149.3, 135.0, 134.7, 134.3, 132.0, 130.4, 129.8, 129.7, 129.6, 128.6, 128.2, 128.0, 126.9, 125.4, 125.0, 123.4, 120.0, 117.3, 111.3. MS (EI)  $m/z$ : 340, 302, 268, 239, 213. Anal. Calcd for  $\text{C}_{20}\text{H}_{12}\text{Cl}_2\text{O}$ : C, 70.81; H, 3.57. Found: C, 70.79; H, 3.58.

#### **2,3-Di-*p*-tolylbenzofuran (4f)**

Yellow oil,  $^1\text{H}$  NMR (400 MHz,  $\text{CDCl}_3$ )  $\delta$  = 7.55 (d,  $J$  = 8.0Hz, 2H), 7.51-7.53 (m, 1H), 7.47-7.48 (m, 1H), 7.38 (d,  $J$  = 8.0Hz, 2H), 7.24-7.30 (m, 3H), 7.18-7.22 (m, 1H), 7.11 (d,  $J$  = 8.0Hz, 2H), 2.41 (s, 3H), 2.33 (s, 3H).  $^{13}\text{C}$  NMR (100 MHz,  $\text{CDCl}_3$ )  $\delta$  = 154.0, 150.7, 138.3, 137.2, 130.5, 130.0, 129.7, 129.7, 129.2, 128.1, 127.0, 124.4, 122.8, 120.0, 116.8, 111.0, 21.4. MS (EI)  $m/z$ : 298, 282, 268, 255, 239. Anal. Calcd for  $\text{C}_{22}\text{H}_{18}\text{O}$ : C, 88.56; H, 6.08. Found: C, 88.54; H, 6.09.

#### **2-Hexyl-3-phenylbenzofuran (4g)**

Yellow oil,  $^1\text{H}$  NMR (400 MHz,  $\text{CDCl}_3$ )  $\delta$  = 7.54 (d,  $J$  = 8.0Hz, 1H), 7.45-7.48 (m, 5H), 7.35-7.38 (m, 1H), 7.19-7.27 (m, 2H), 2.85 (t,  $J$  = 7.6Hz, 2H), 1.73-1.81 (m, 2H), 1.27-1.37 (m, 6H), 0.84-0.87 (m, 3H).  $^{13}\text{C}$  NMR (100 MHz,  $\text{CDCl}_3$ )  $\delta$  = 155.4, 154.0, 132.9, 129.1, 128.9, 128.7, 127.0, 123.5, 122.5, 119.4, 116.8, 110.8, 31.5, 29.0, 28.4, 26.8, 22.6, 14.1. MS (EI)  $m/z$ : 278, 207, 179, 152. Anal. Calcd for  $\text{C}_{20}\text{H}_{22}\text{O}$ : C, 86.29; H, 7.97. Found: C, 86.25; H, 7.98.

#### **2-Methyl-3-phenylbenzofuran (4h)**

Yellow oil,  $^1\text{H}$  NMR (400 MHz,  $\text{CDCl}_3$ )  $\delta$  = 7.57 (d,  $J$  = 7.2Hz, 1H), 7.44-7.51 (m, 5H), 7.33-7.37 (m, 1H), 7.19-7.27 (m, 2H), 2.53 (s, 3H).  $^{13}\text{C}$  NMR (100 MHz,  $\text{CDCl}_3$ )  $\delta$  = 154.1, 151.3, 132.9, 129.0, 128.8, 127.0, 123.8, 123.6, 122.6, 119.4, 116.9, 110.8, 12.8. MS (EI)  $m/z$ : 208, 178, 165, 152, 131. Anal. Calcd for  $\text{C}_{15}\text{H}_{12}\text{O}$ : C, 86.51; H, 5.81. Found: C, 86.49; H, 5.82.

#### **2-Hexyl-3-*o*-tolylbenzofuran (4i)**

Yellow oil,  $^1\text{H}$  NMR (400 MHz,  $\text{CDCl}_3$ )  $\delta$  = 7.46 (d,  $J$  = 7.2Hz, 1H), 7.30-7.32 (m, 2H), 7.14-7.24 (m, 5H), 2.57-2.72 (m, 2H), 2.18 (s, 3H), 1.65-1.72 (m, 2H), 1.23-1.26 (m, 6H), 0.82-0.85 (m, 3H).  $^{13}\text{C}$  NMR (100 MHz,  $\text{CDCl}_3$ )  $\delta$  = 155.4, 153.9, 137.7, 131.9, 130.9, 130.2, 129.6, 127.8, 125.8, 123.3, 122.3, 119.8, 116.5, 110.8, 31.5, 28.9, 28.0, 26.8, 22.5, 20.1, 14.0. MS (EI)  $m/z$ : 292, 221, 205, 193, 178. Anal. Calcd for  $\text{C}_{21}\text{H}_{24}\text{O}$ : C, 86.26; H, 8.27. Found: C, 86.24; H, 8.28.

## NMR Spectra

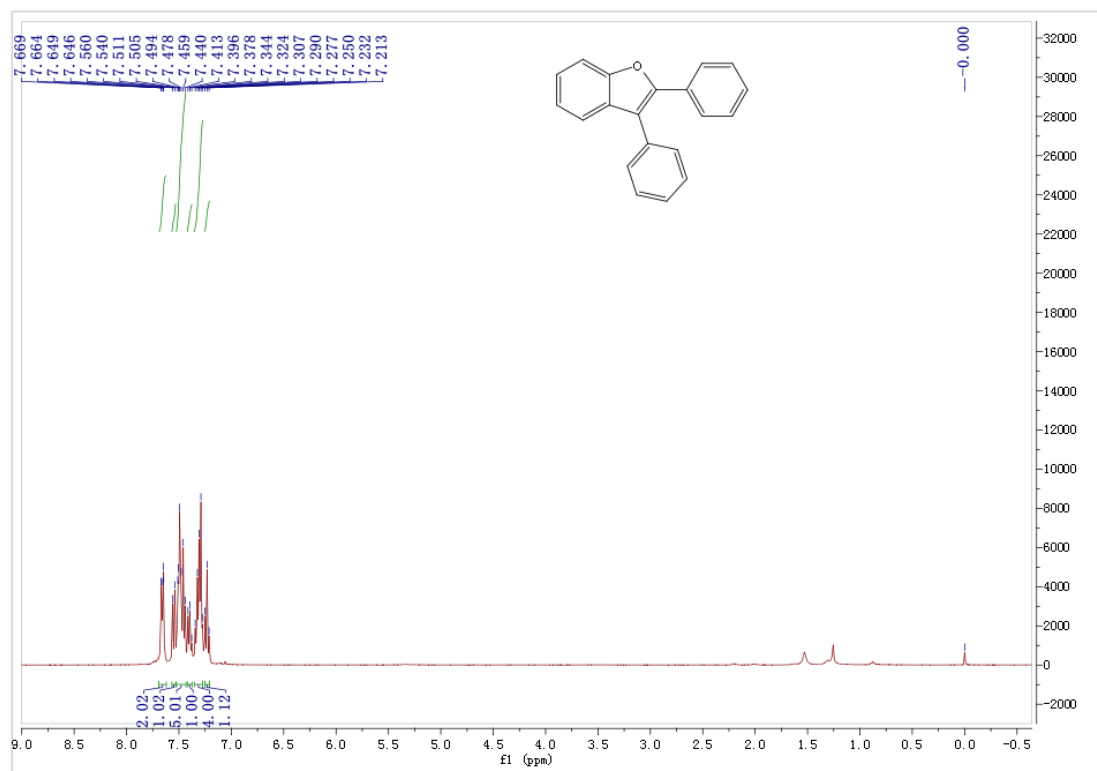

Fig. S-1. <sup>1</sup>H-NMR spectrum of 3a.

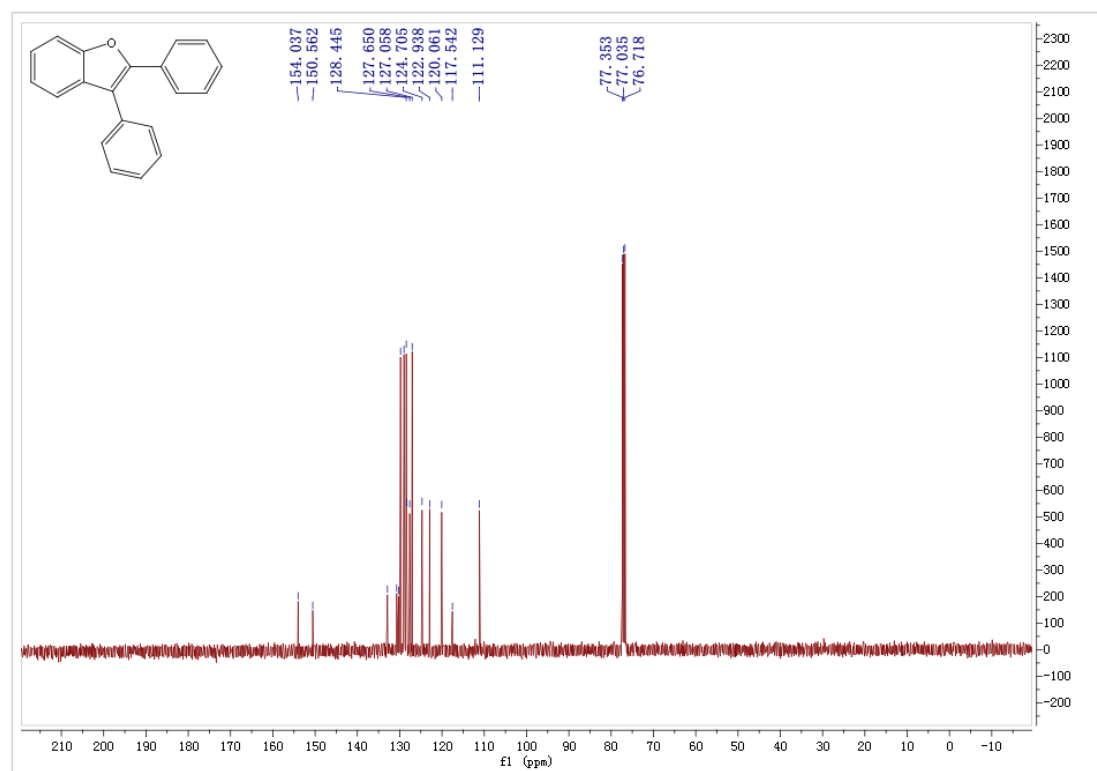

Fig. S-2. <sup>13</sup>C-NMR spectrum of 3a.

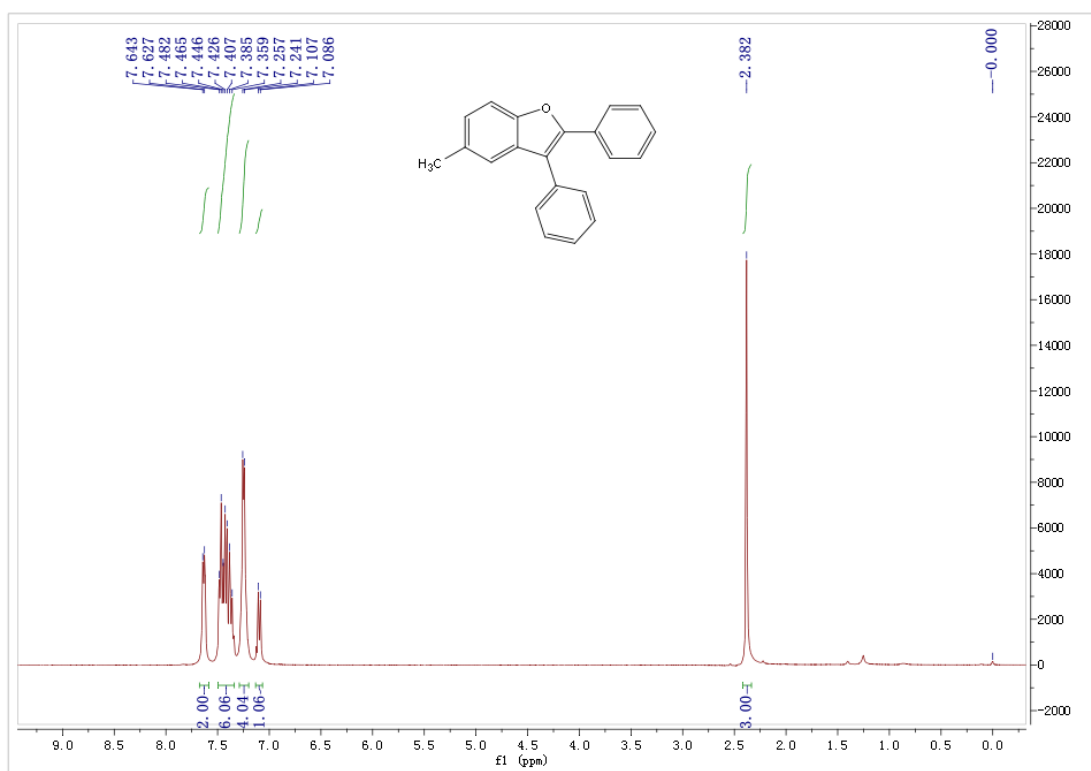

Fig. S-3.  $^1\text{H-NMR}$  spectrum of **3b**.

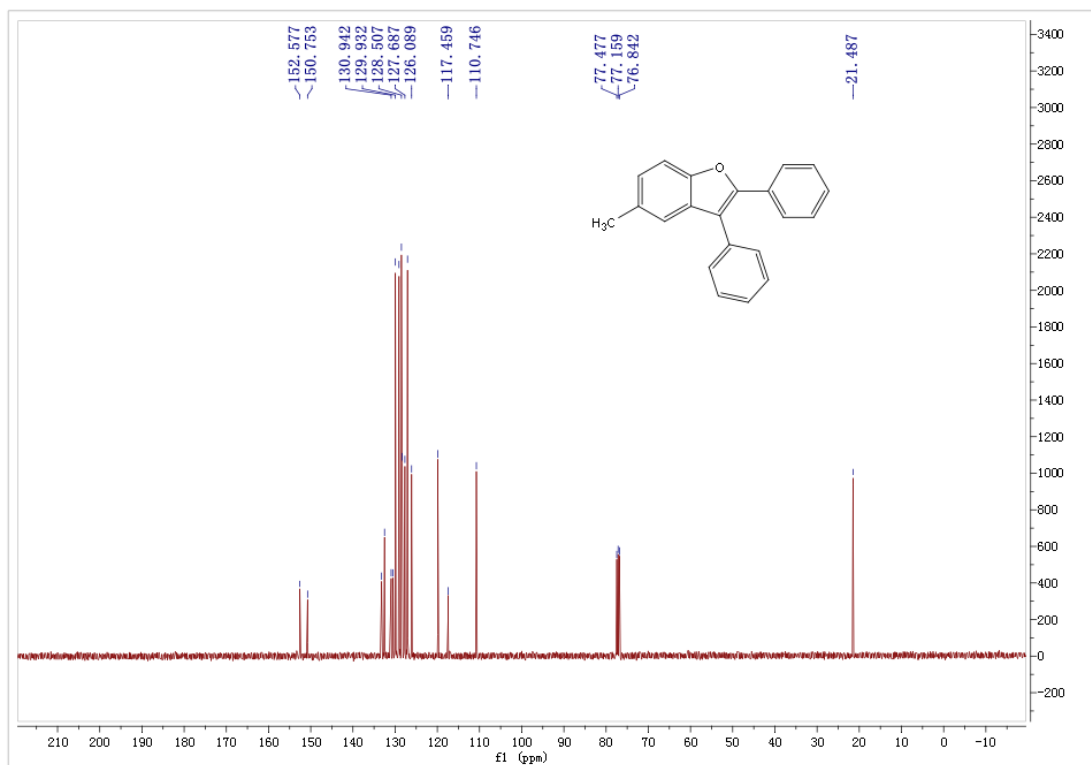

Fig. S-4.  $^{13}\text{C-NMR}$  spectrum of **3b**.



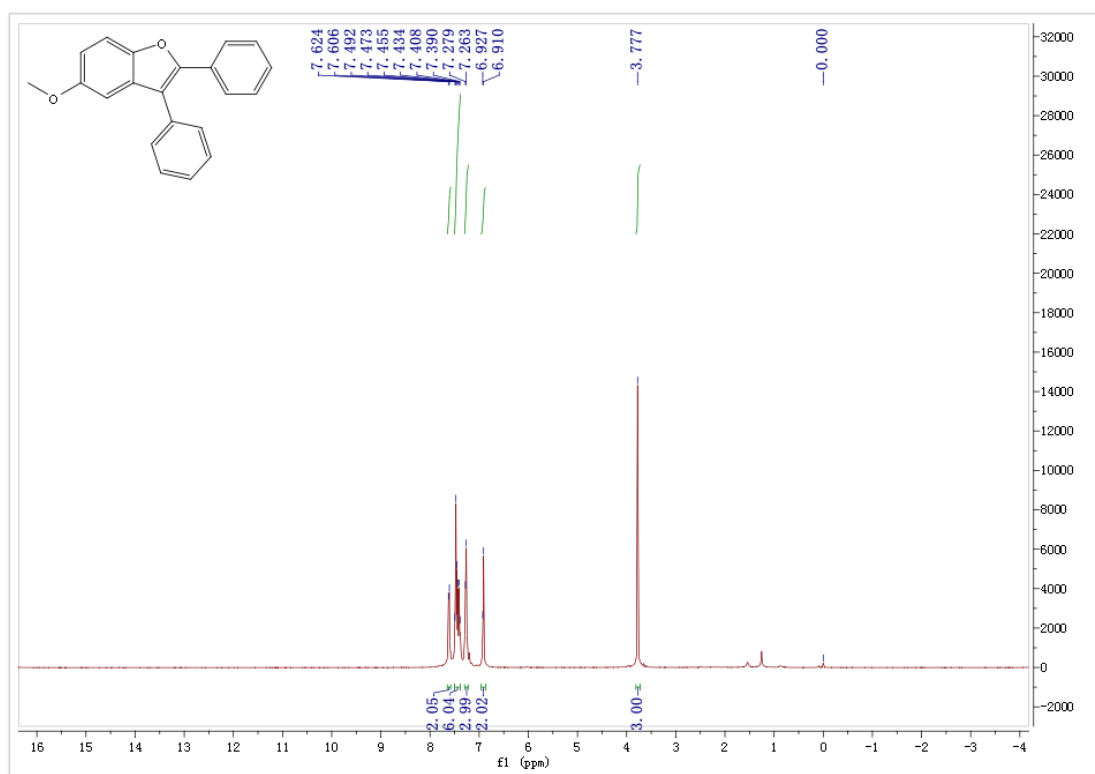

Fig. S-5.  $^1\text{H-NMR}$  spectrum of 3c.

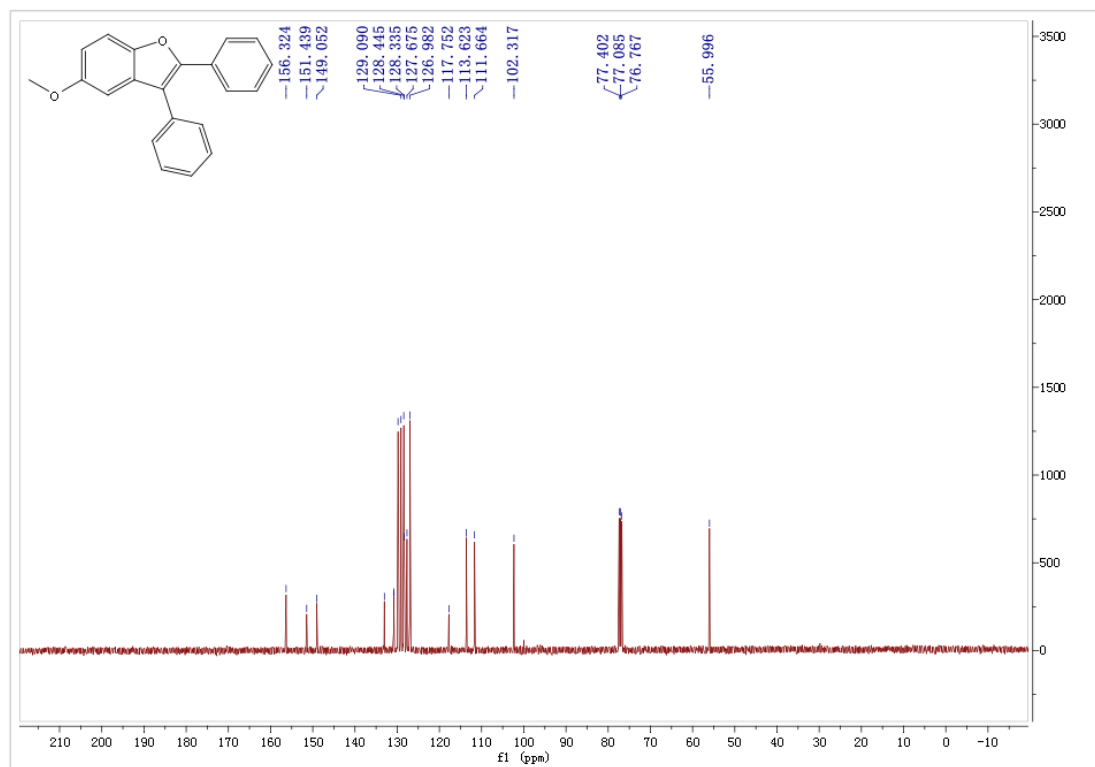

Fig. S-6.  $^{13}\text{C-NMR}$  spectrum of 3c.

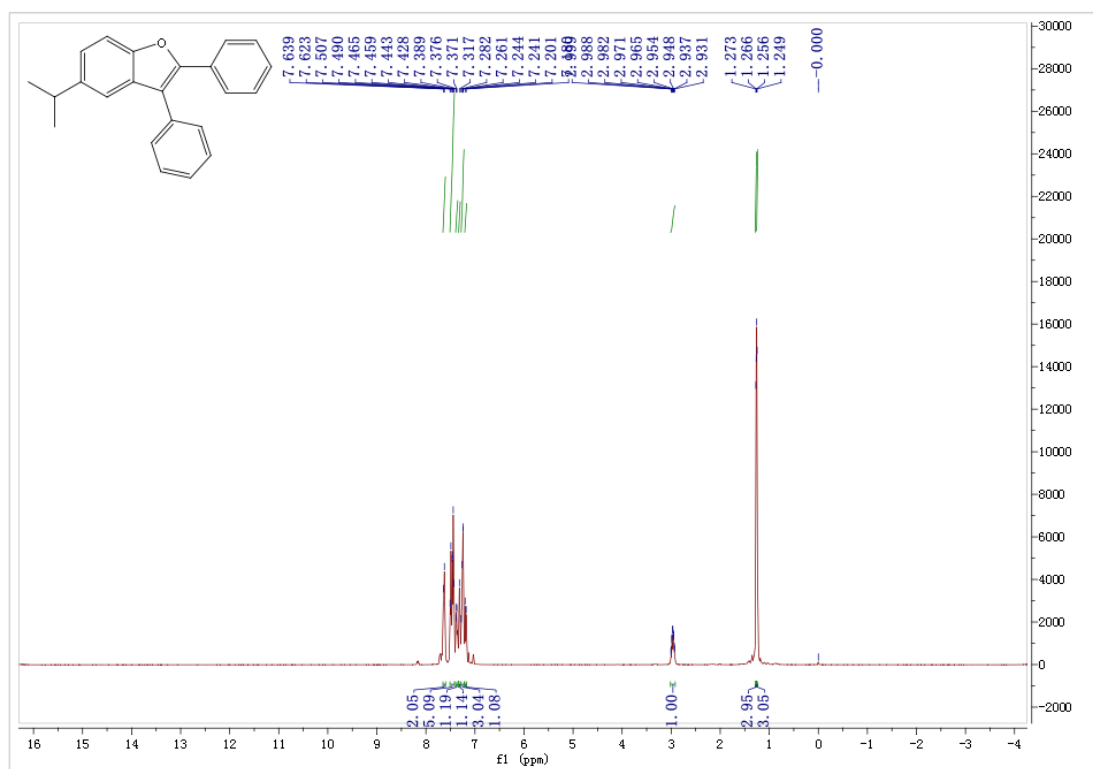

Fig. S-7.  $^1\text{H-NMR}$  spectrum of 3d.

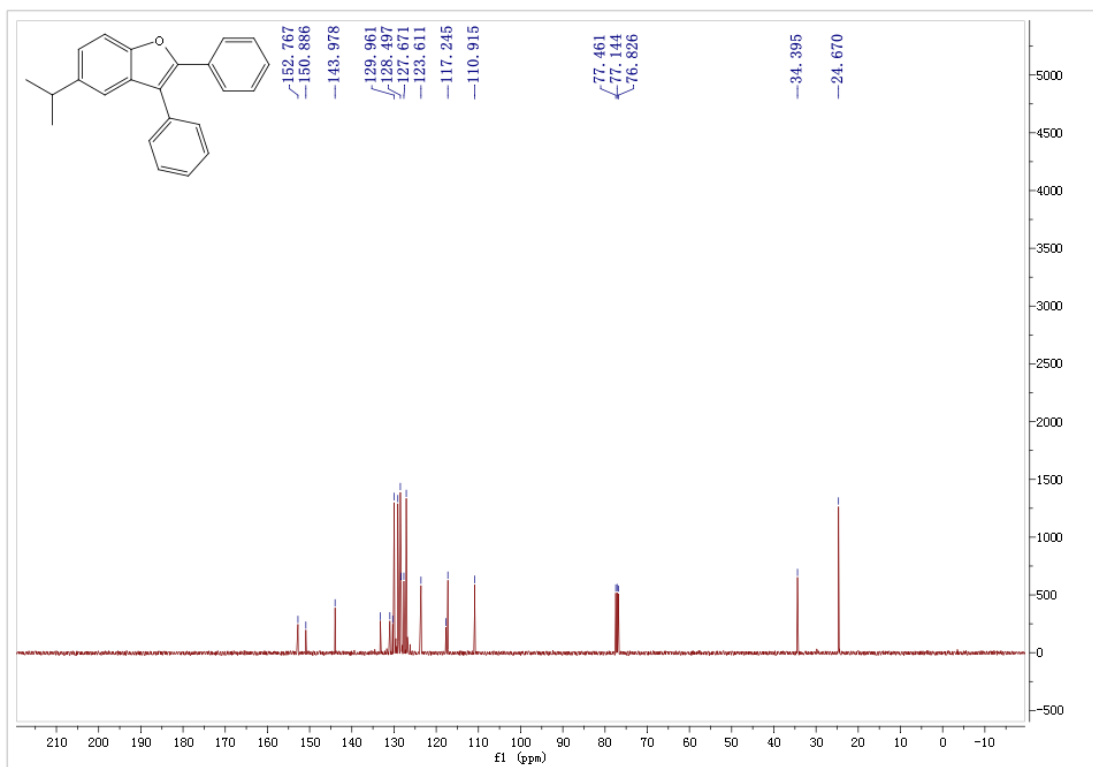

Fig. S-8.  $^{13}\text{C-NMR}$  spectrum of 3d.

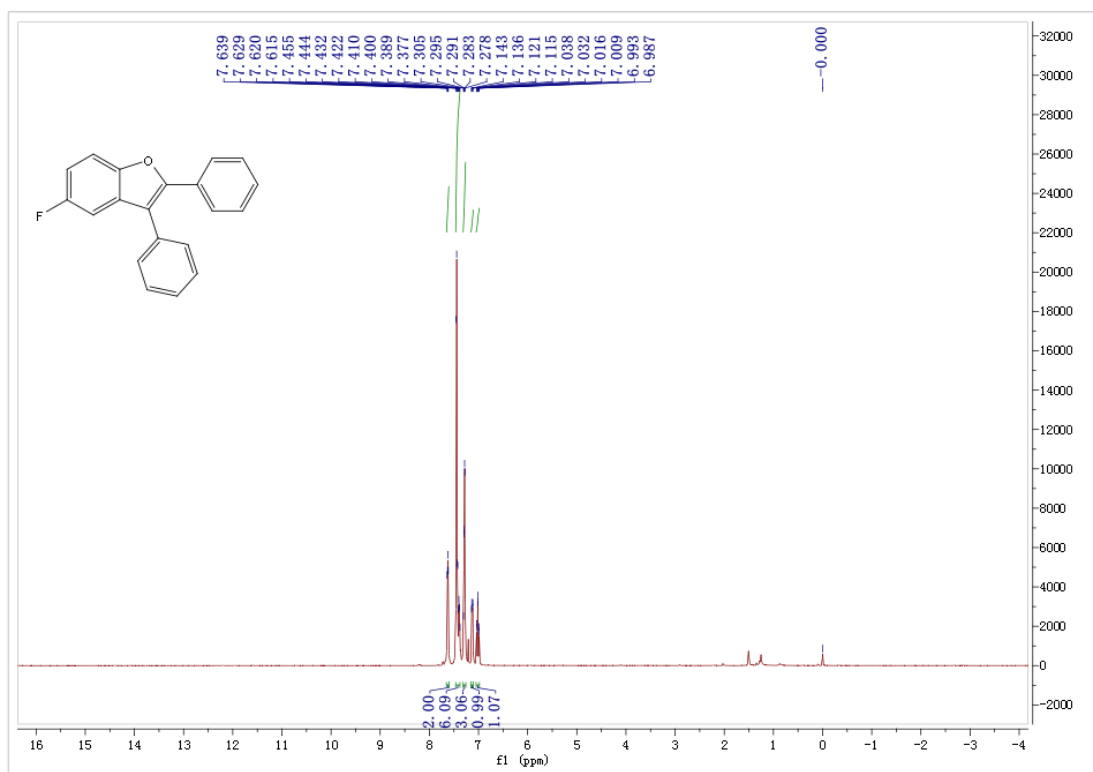

Fig. S-9.  $^1\text{H-NMR}$  spectrum of 3e.

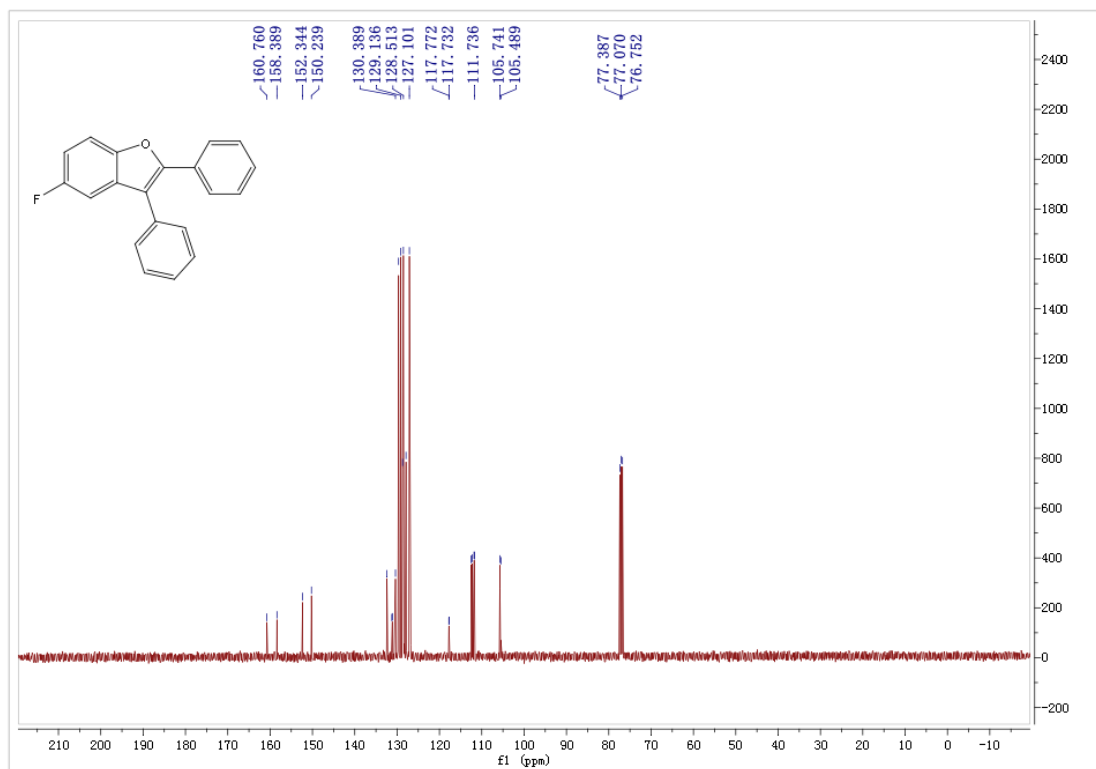

Fig. S-10.  $^{13}\text{C-NMR}$  spectrum of 3e.

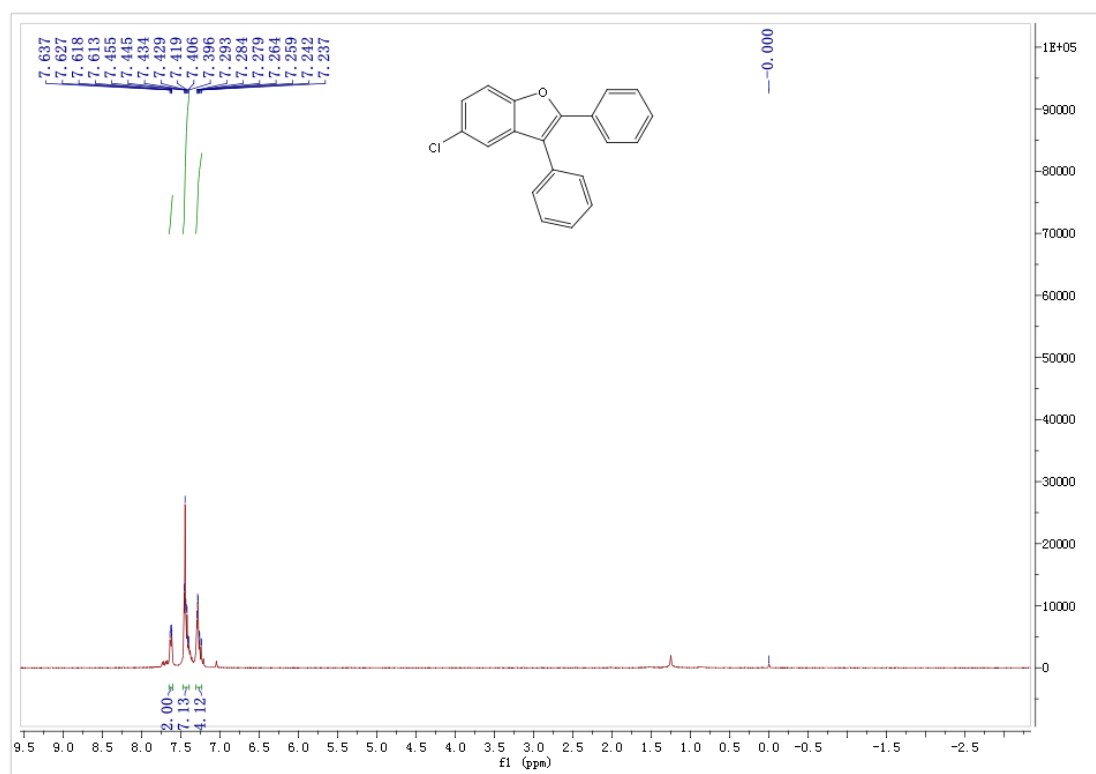

Fig. S-11.  $^1\text{H-NMR}$  spectrum of 3f.

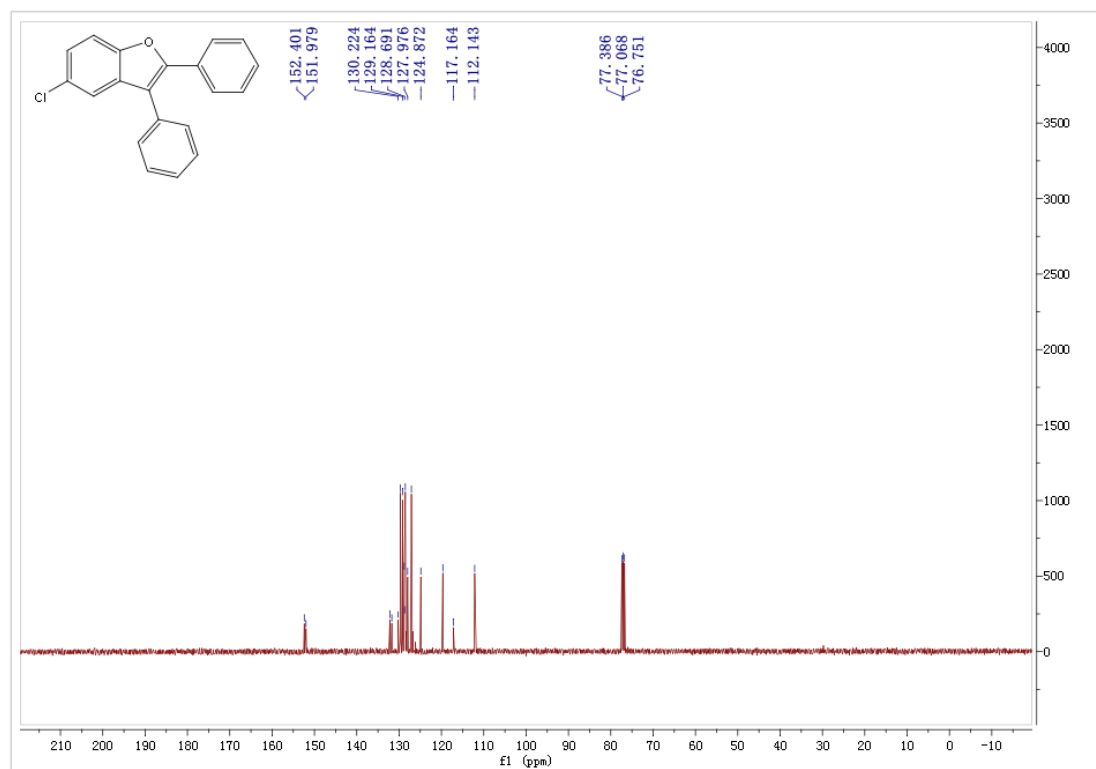

Fig. S-12.  $^{13}\text{C-NMR}$  spectrum of 3f.

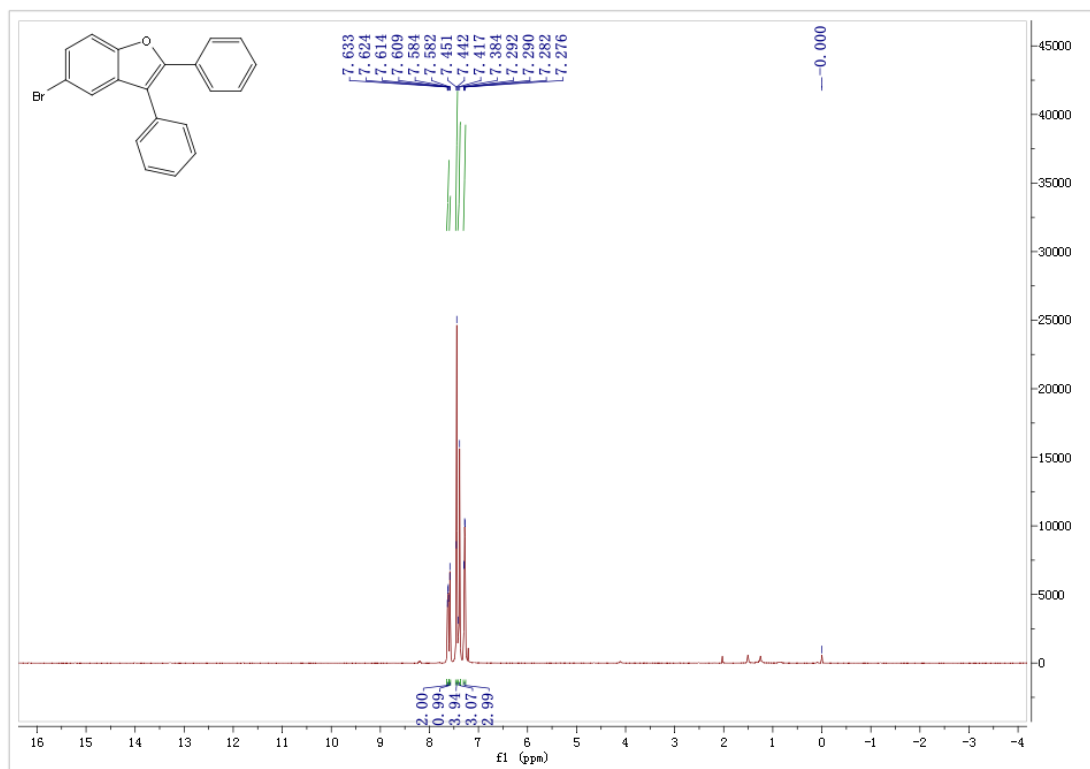

**Fig. S-13.** <sup>1</sup>H-NMR spectrum of **3g**.

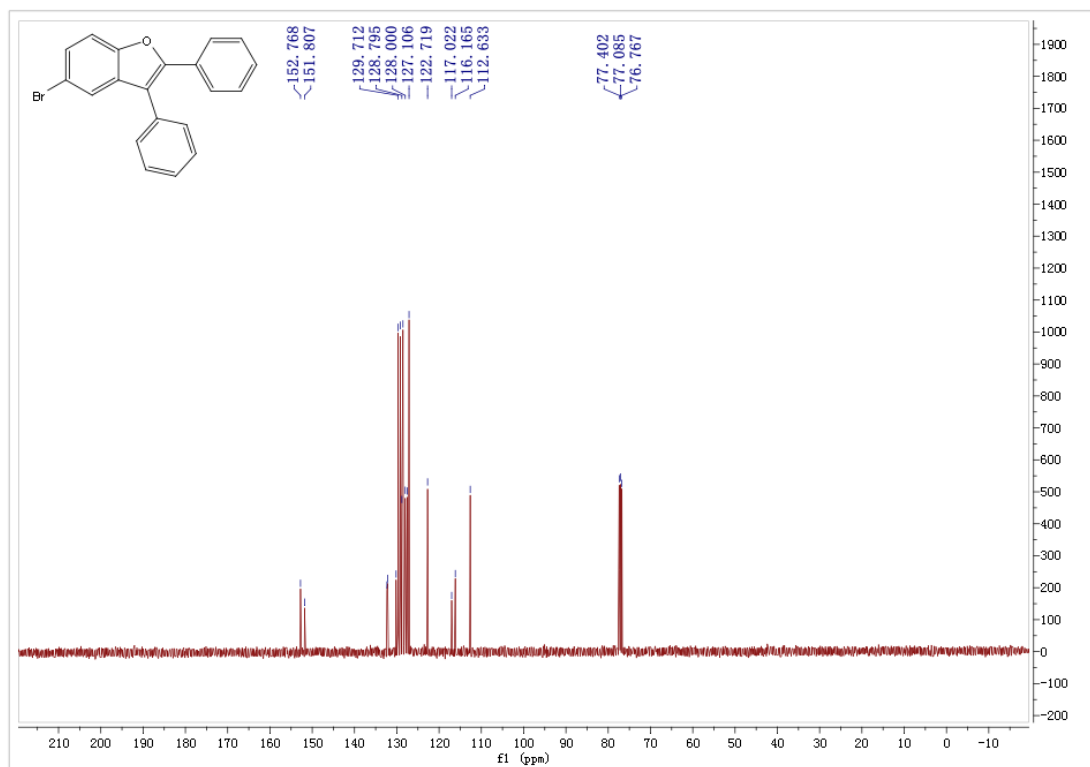

**Fig. S-14.** <sup>13</sup>C-NMR spectrum of **3g**.

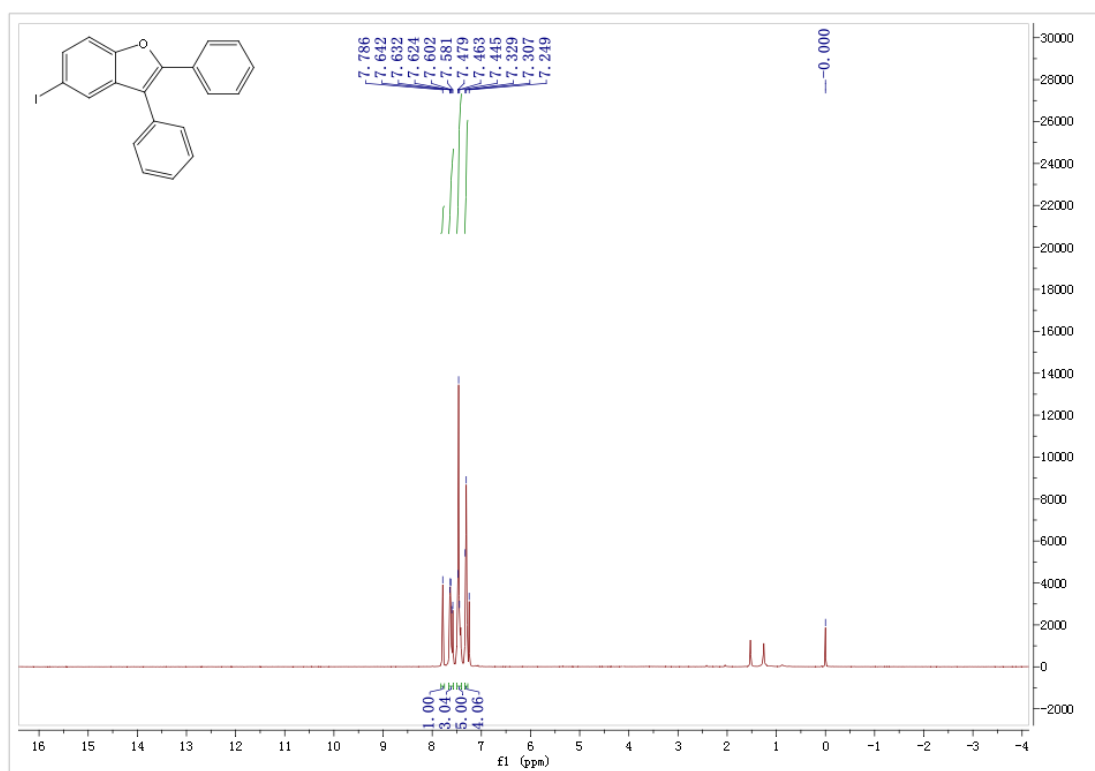

**Fig. S-15.** <sup>1</sup>H-NMR spectrum of **3h**.

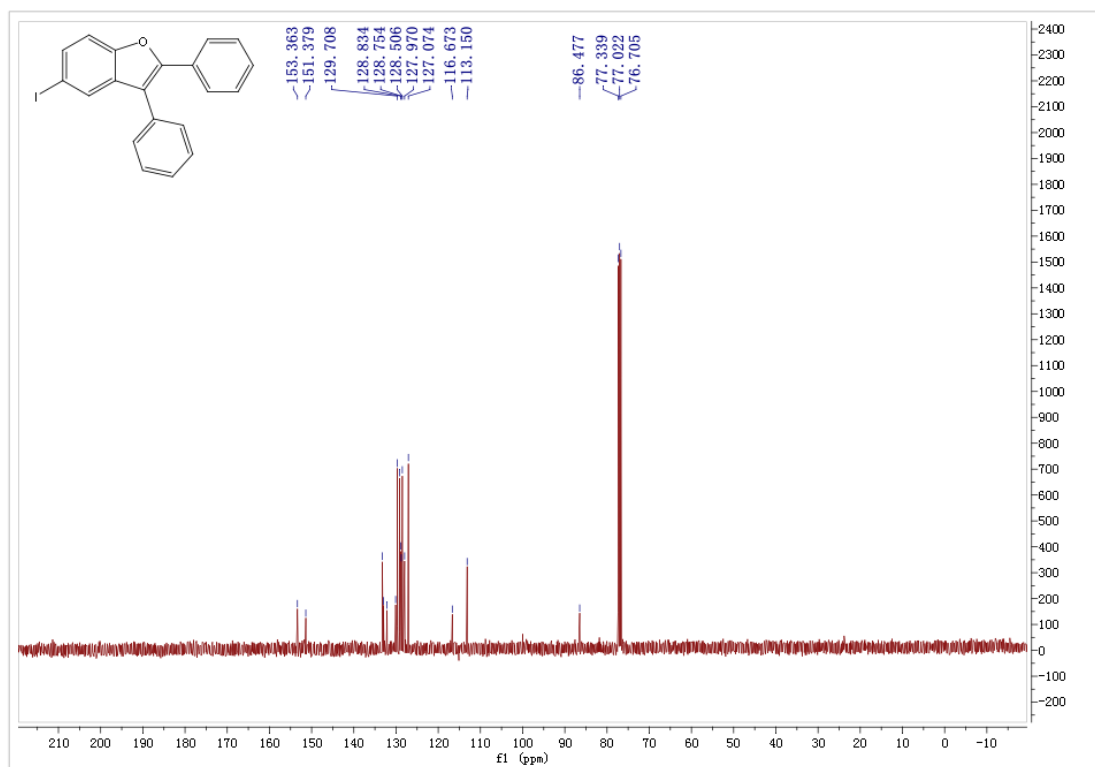

**Fig. S-16.** <sup>13</sup>C-NMR spectrum of **3h**.

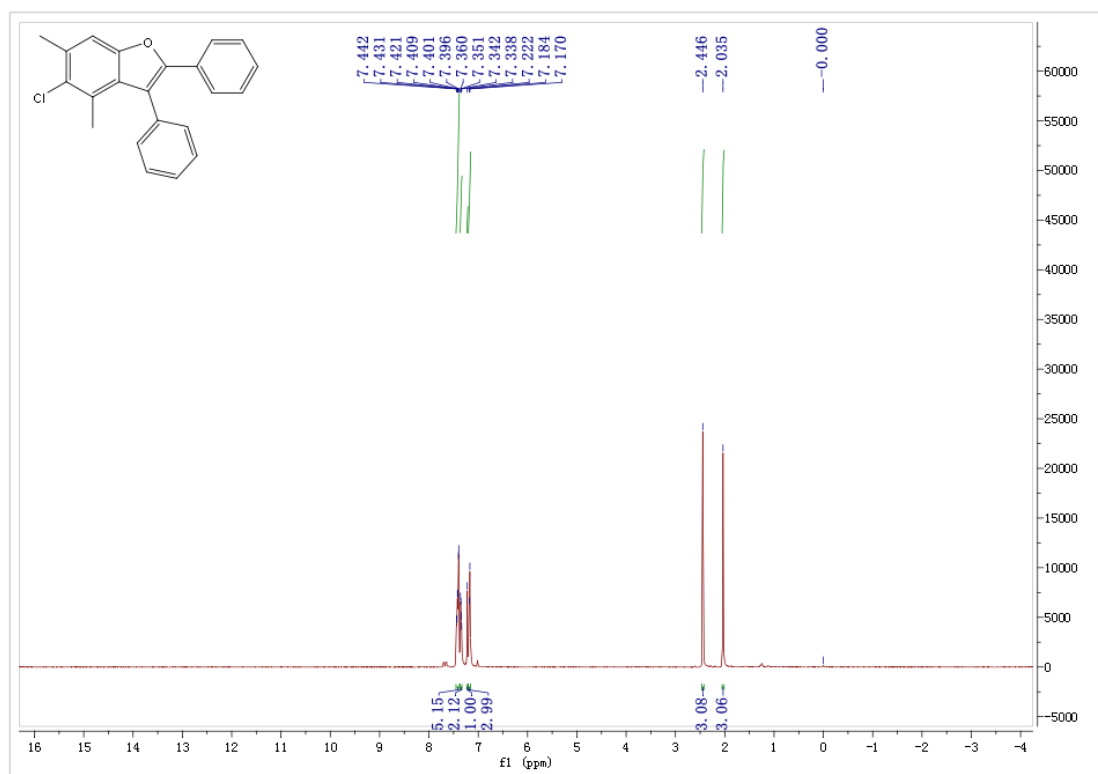

**Fig. S-17.** <sup>1</sup>H-NMR spectrum of **3i**.

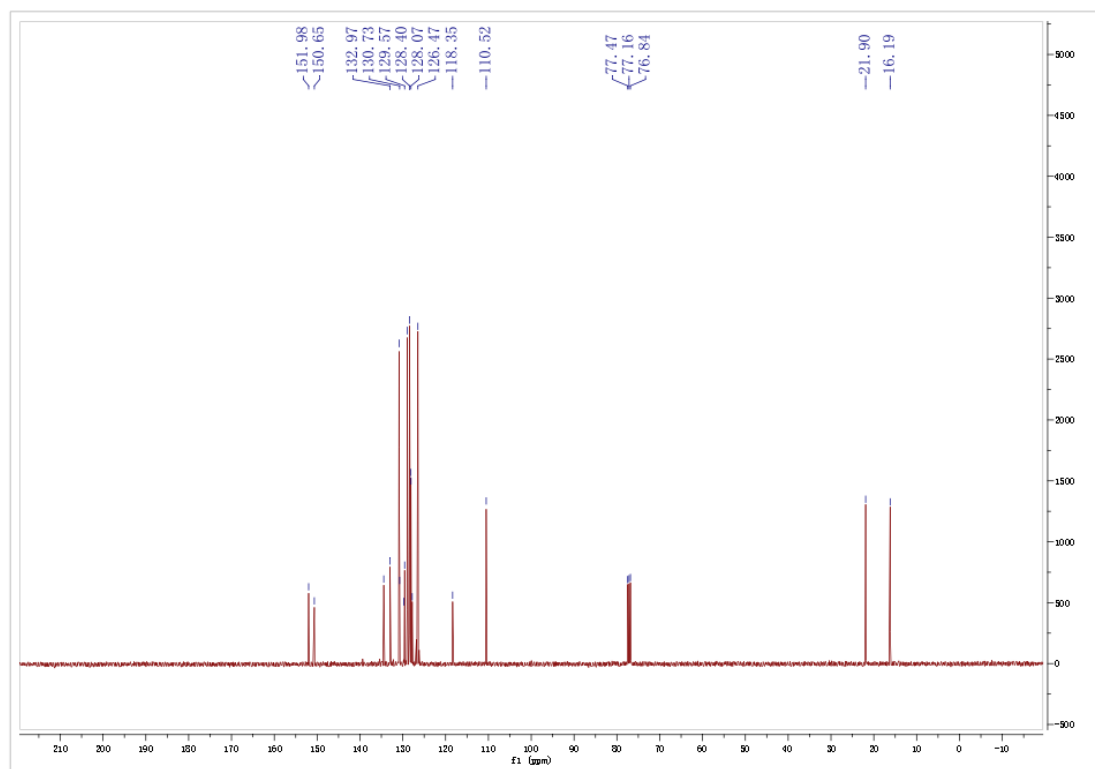

**Fig. S-18.** <sup>13</sup>C-NMR spectrum of **3i**.

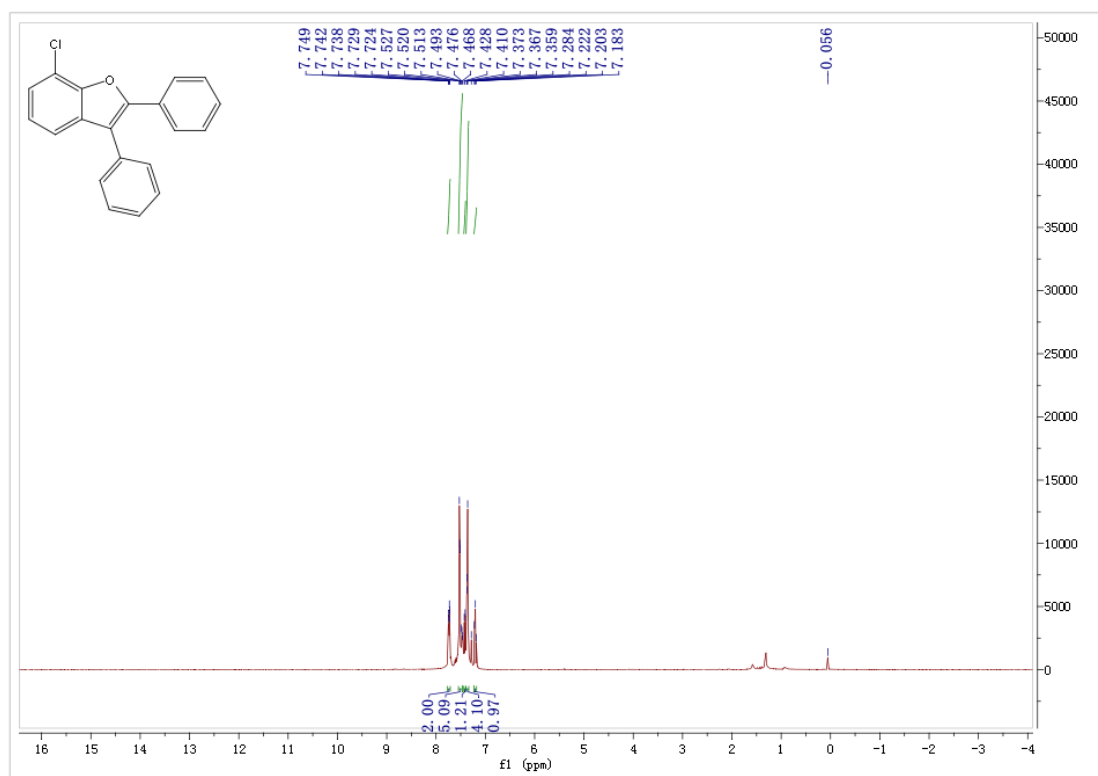

**Fig. S-19.** <sup>1</sup>H-NMR spectrum of **3j**.

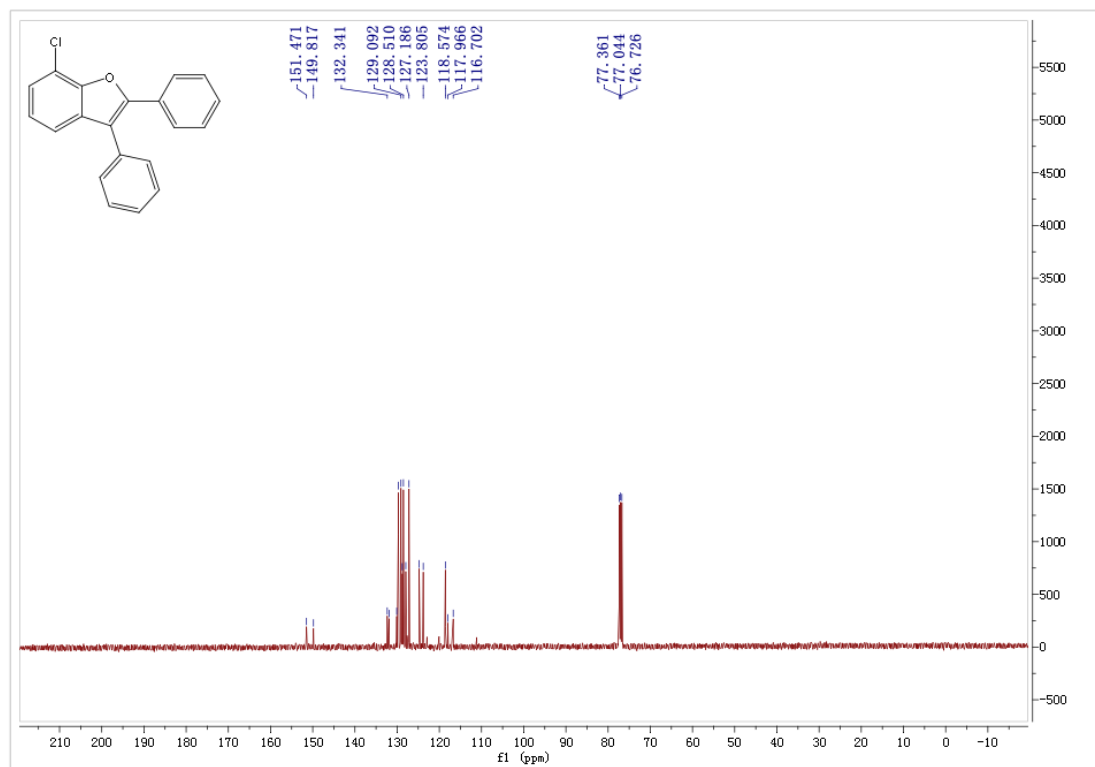

**Fig. S-20.** <sup>13</sup>C-NMR spectrum of **3j**.



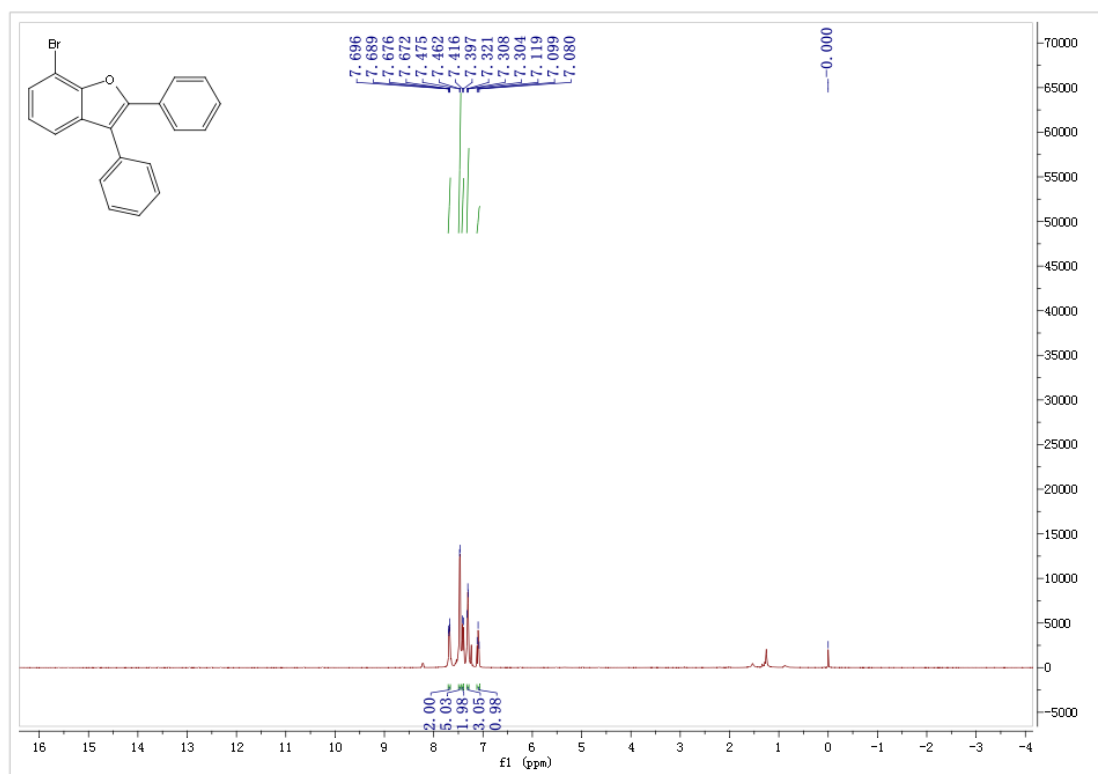

**Fig. S-21.** <sup>1</sup>H-NMR spectrum of **3k**.

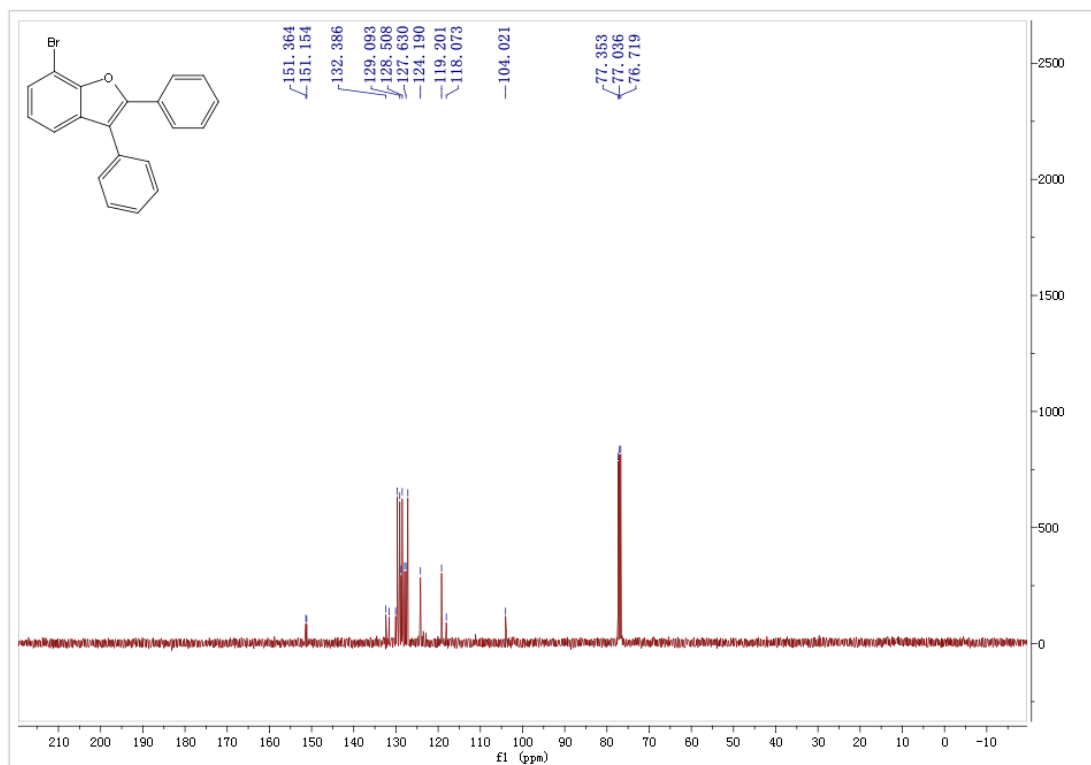

**Fig. S-22.** <sup>13</sup>C-NMR spectrum of **3k**.

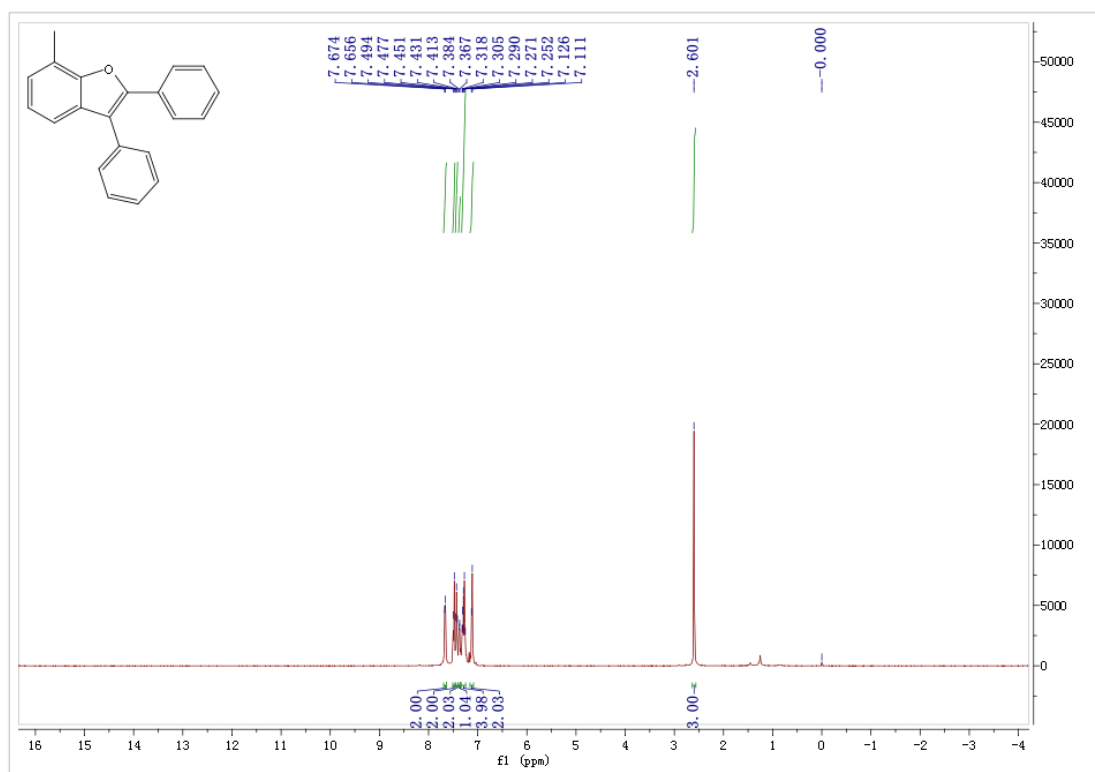

Fig. S-23.  $^1\text{H-NMR}$  spectrum of **3l**.

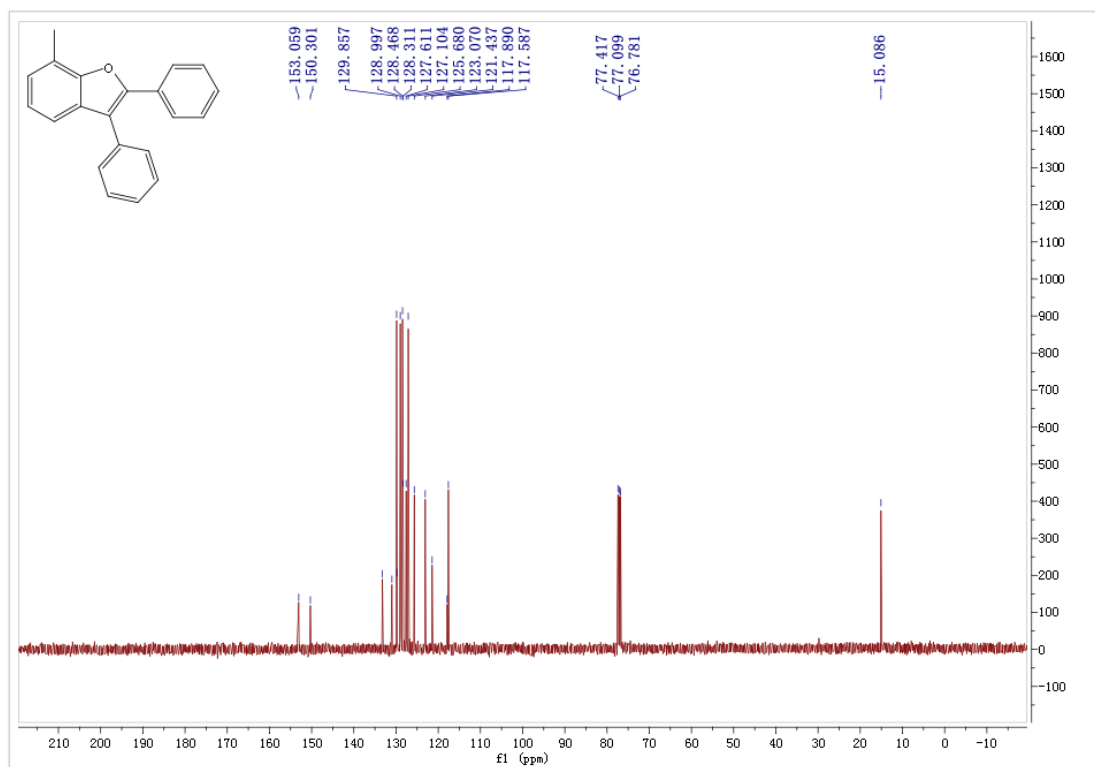

Fig. S-24.  $^{13}\text{C-NMR}$  spectrum of **3l**.

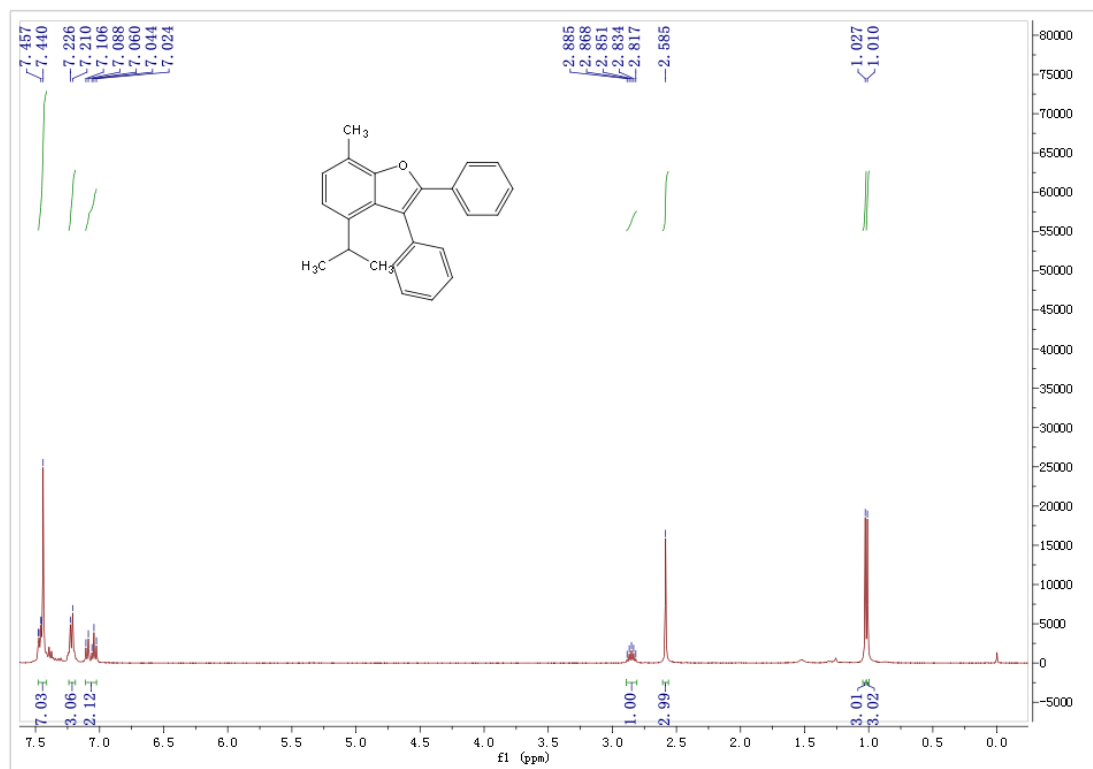

**Fig. S-25.** <sup>1</sup>H-NMR spectrum of **3m**.

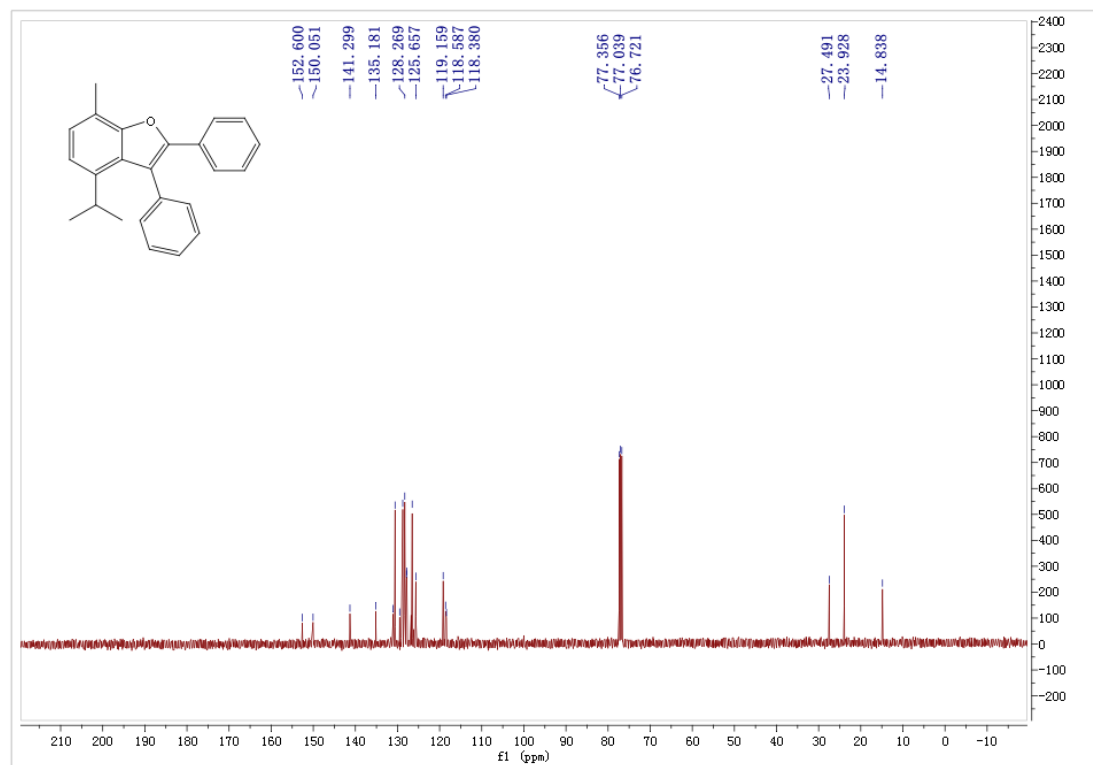

**Fig. S-26.** <sup>13</sup>C-NMR spectrum of **3m**.

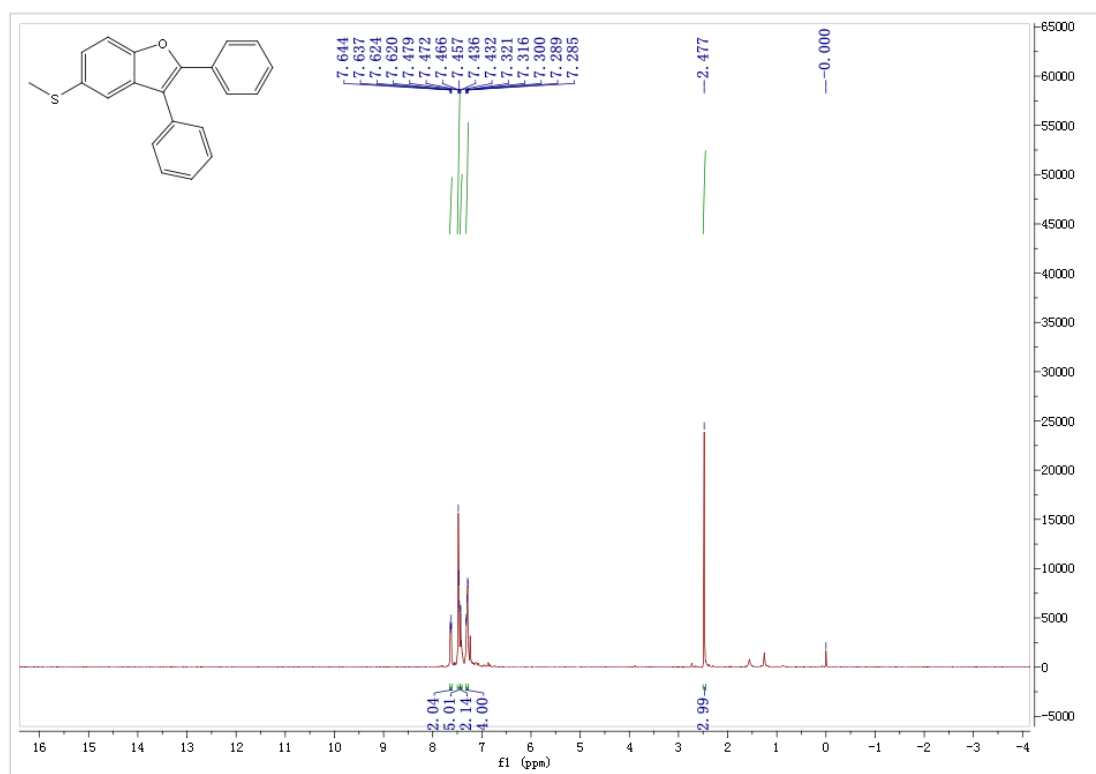

**Fig. S-27.** <sup>1</sup>H-NMR spectrum of **3n**.

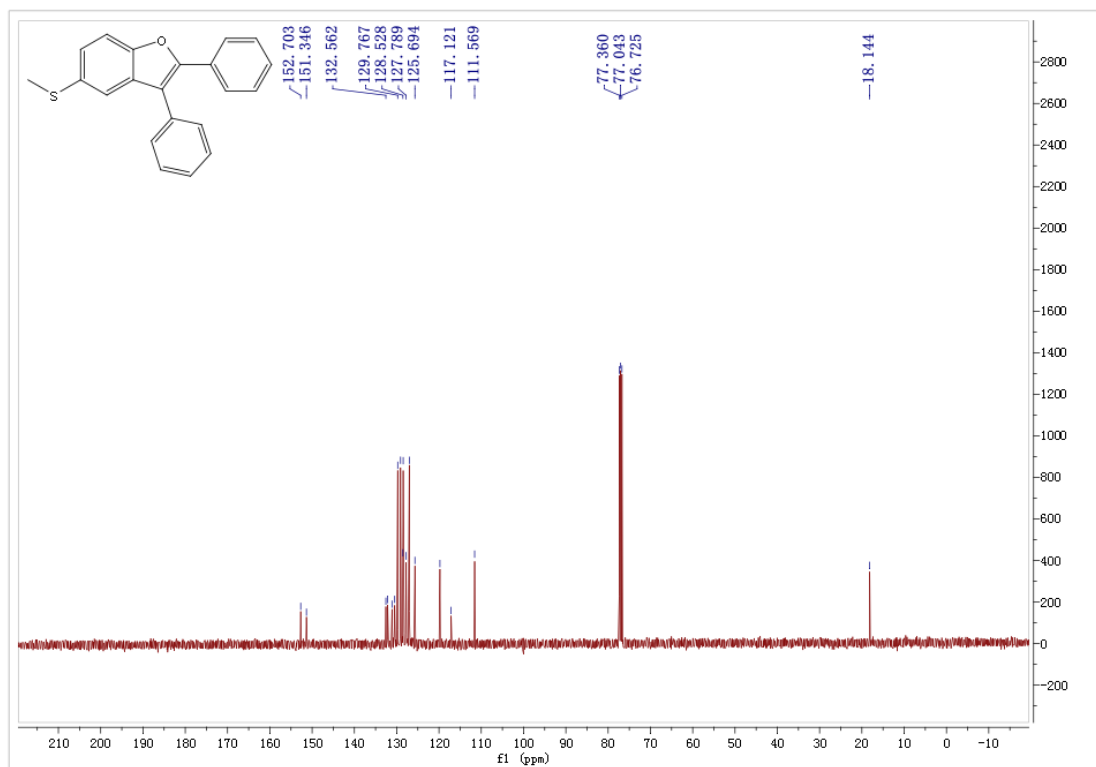

**Fig. S-28.** <sup>13</sup>C-NMR spectrum of **3n**.

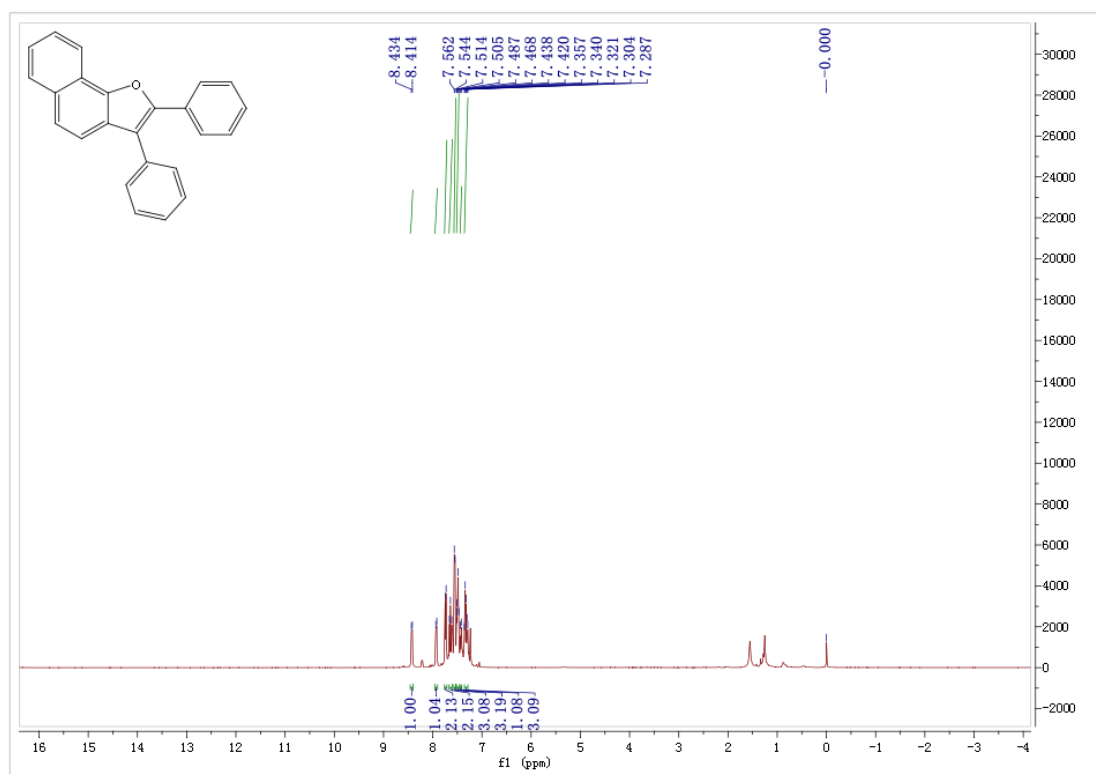

**Fig. S-29.** <sup>1</sup>H-NMR spectrum of **3o**.

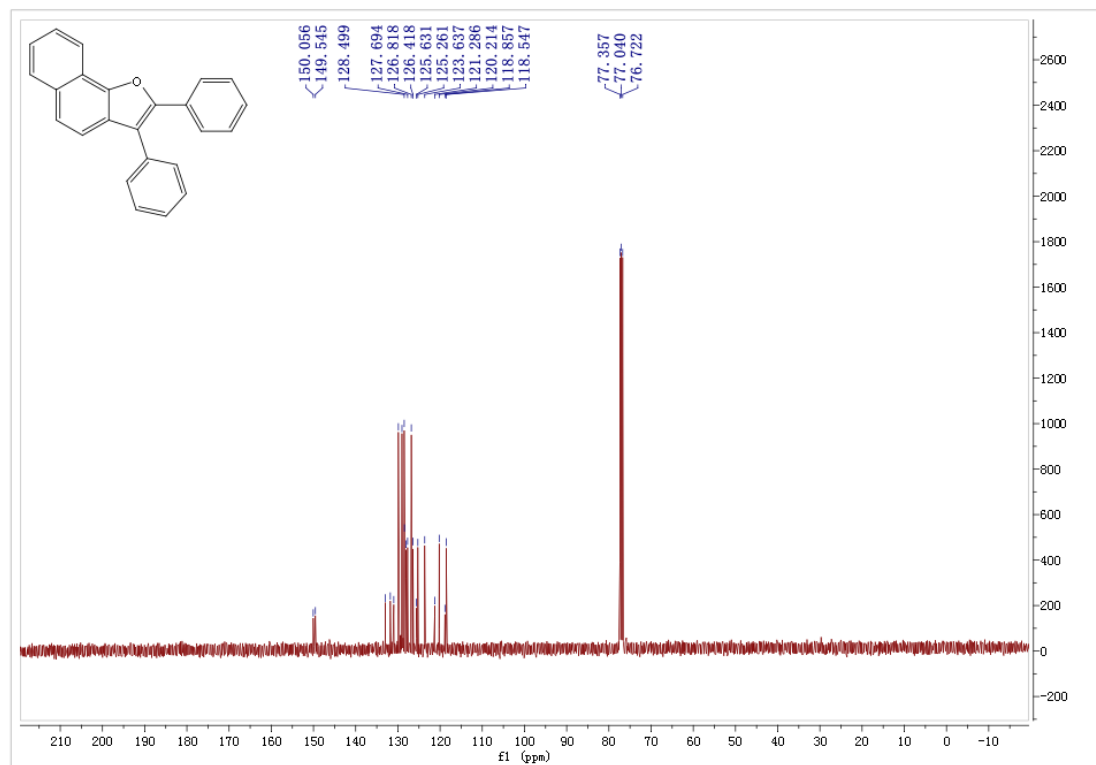

**Fig. S-30.** <sup>13</sup>C-NMR spectrum of **3o**.

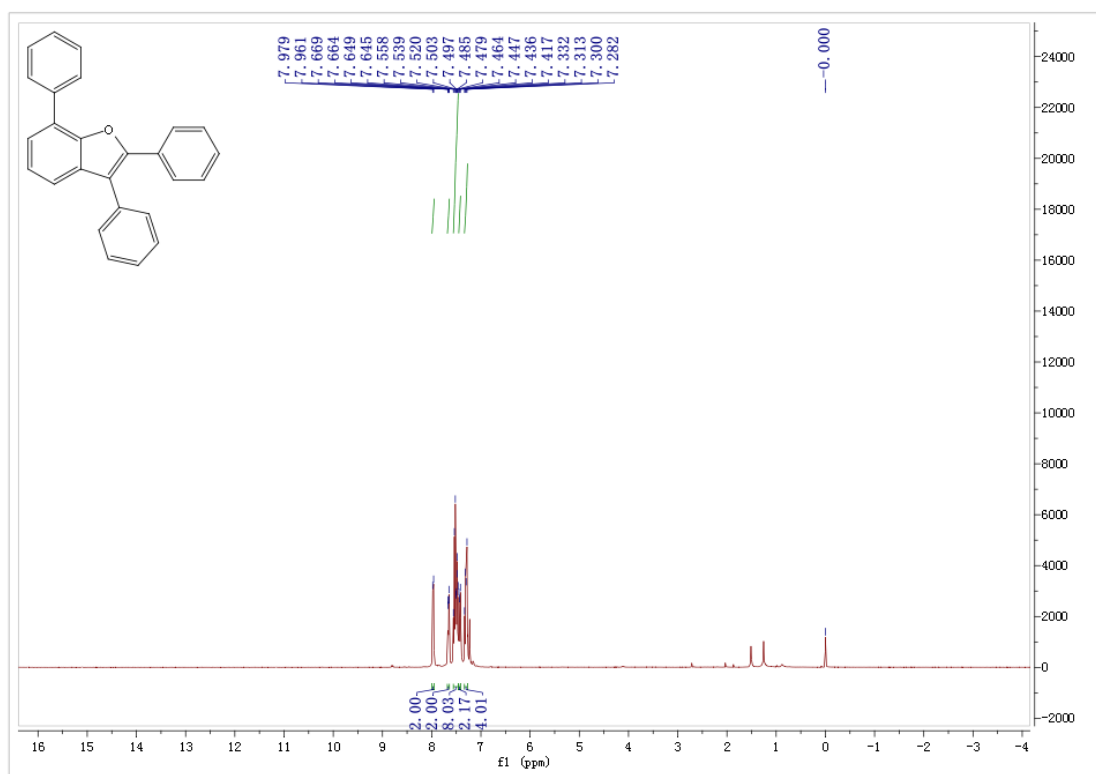

**Fig. S-31.** <sup>1</sup>H-NMR spectrum of **3p**.

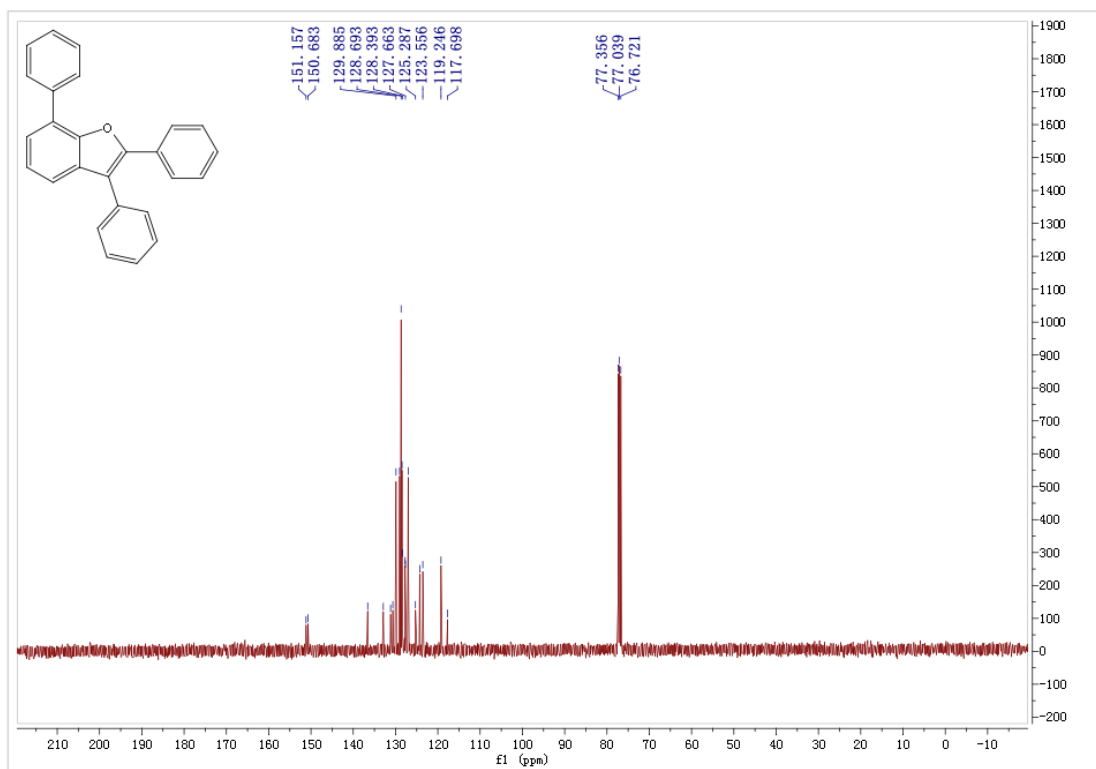

**Fig. S-32.** <sup>13</sup>C-NMR spectrum of **3p**.

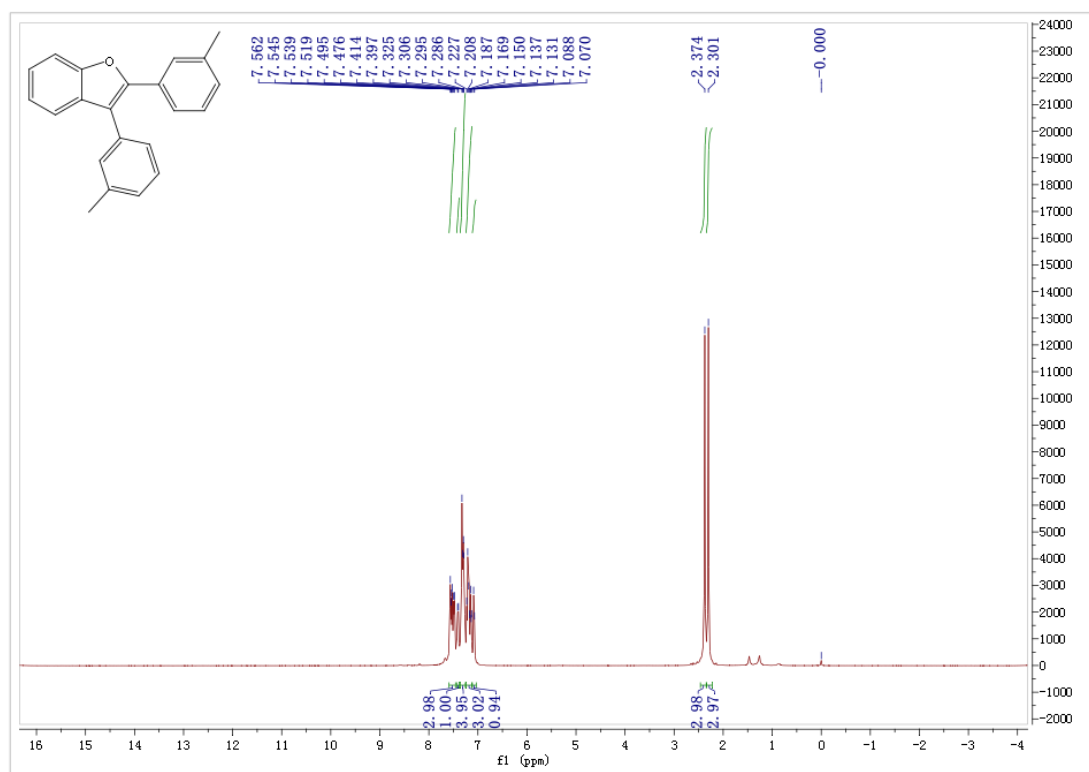

Fig. S-33.  $^1\text{H-NMR}$  spectrum of 4a.

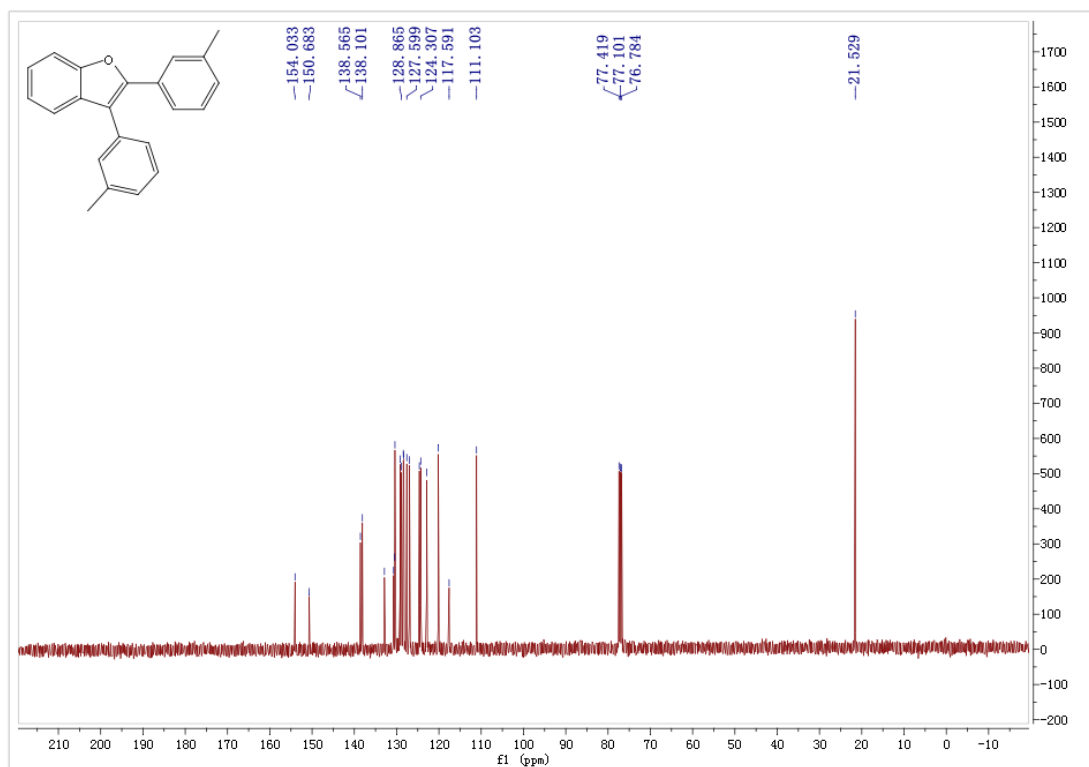

Fig. S-34.  $^{13}\text{C-NMR}$  spectrum of 4a.

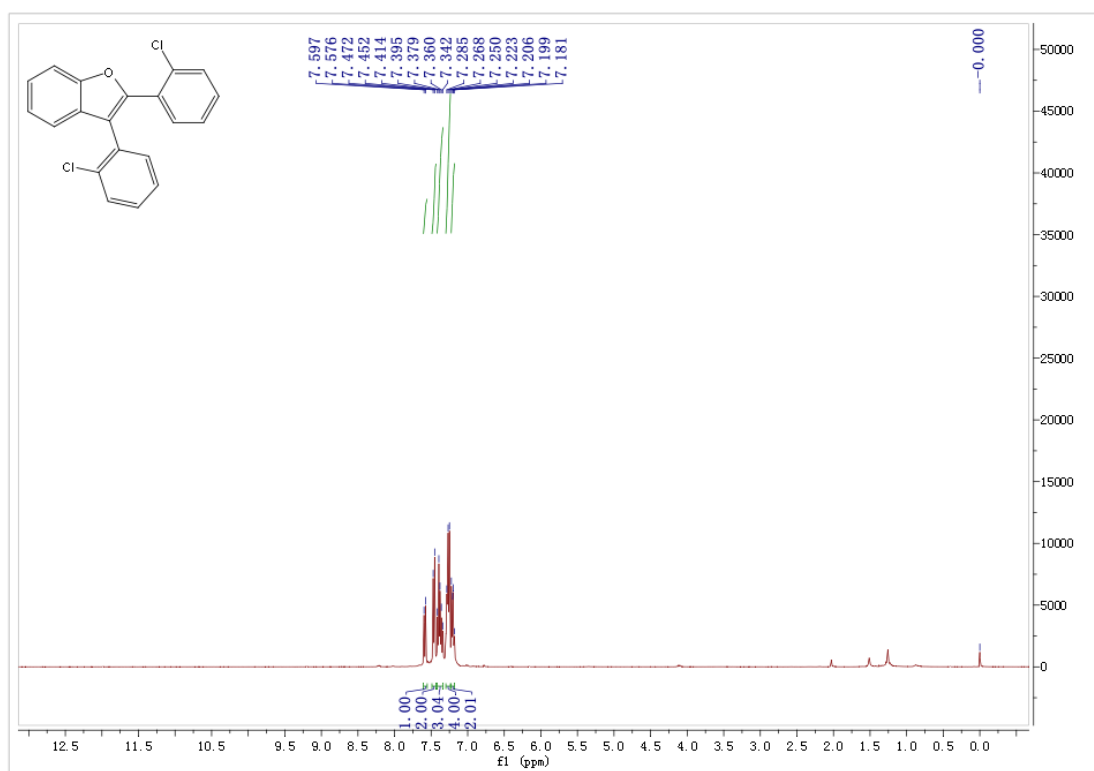

**Fig. S-35.**  $^1\text{H-NMR}$  spectrum of **4b**.

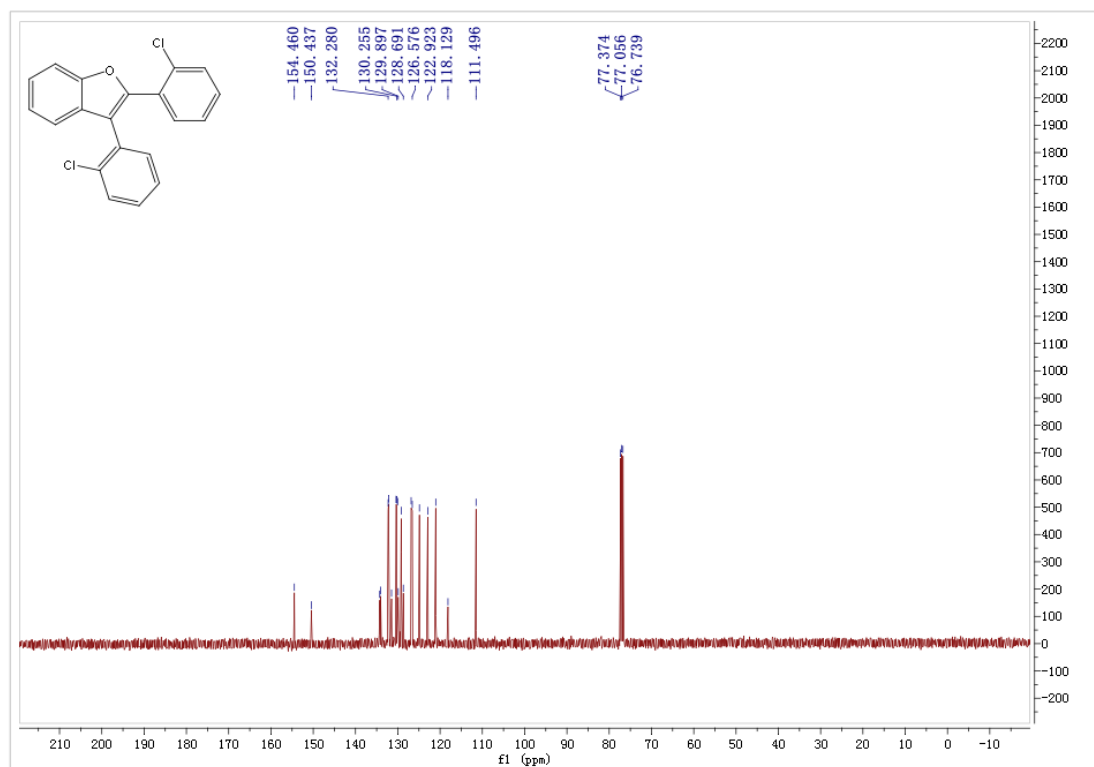

**Fig. S-36.**  $^{13}\text{C-NMR}$  spectrum of **4b**.



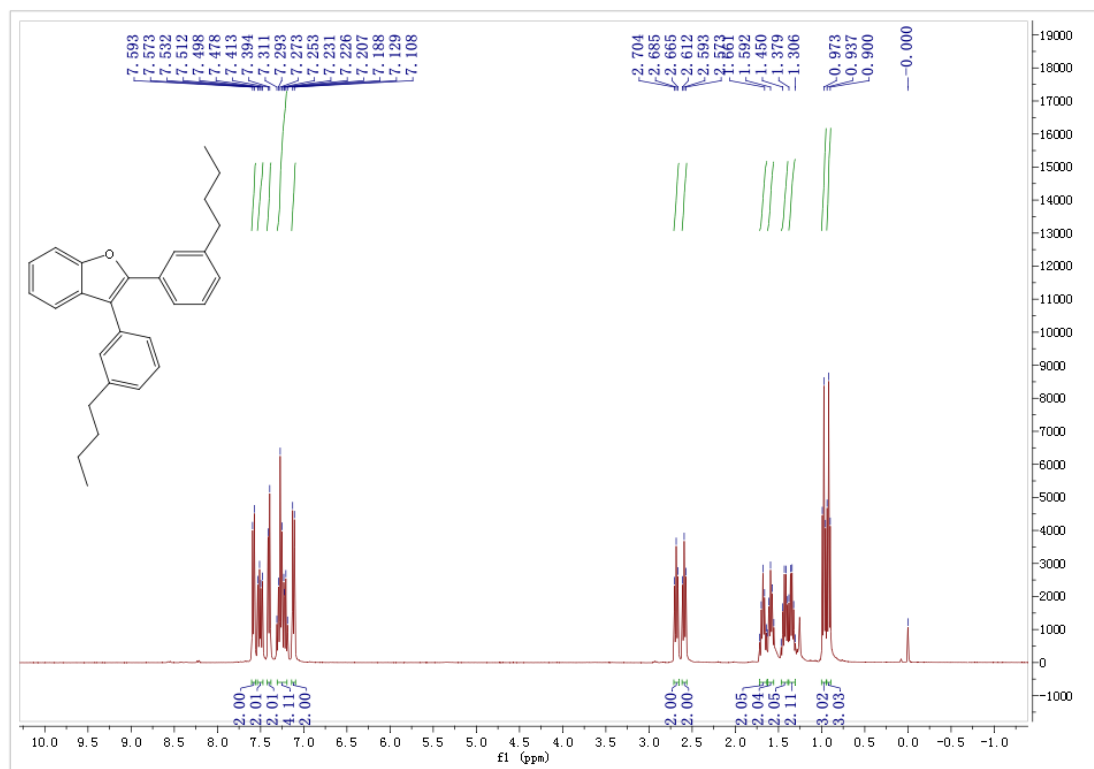

**Fig. S-37.** <sup>1</sup>H-NMR spectrum of **4c**.

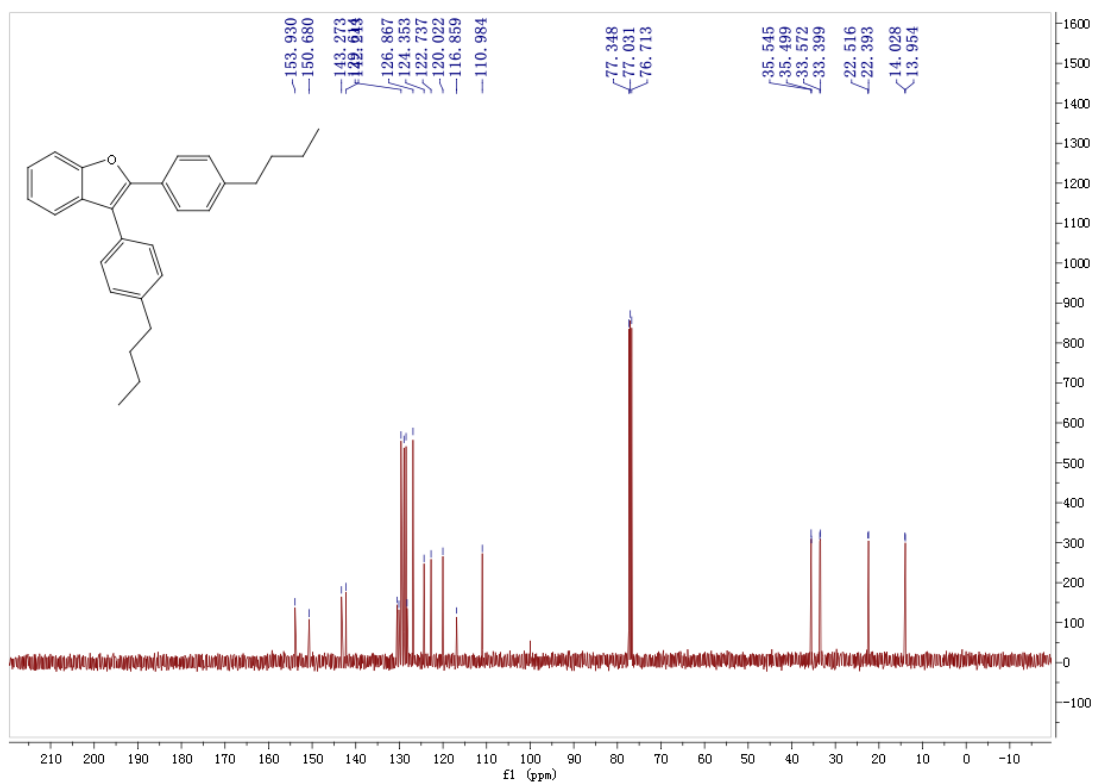

**Fig. S-38.** <sup>13</sup>C-NMR spectrum of **4c**.

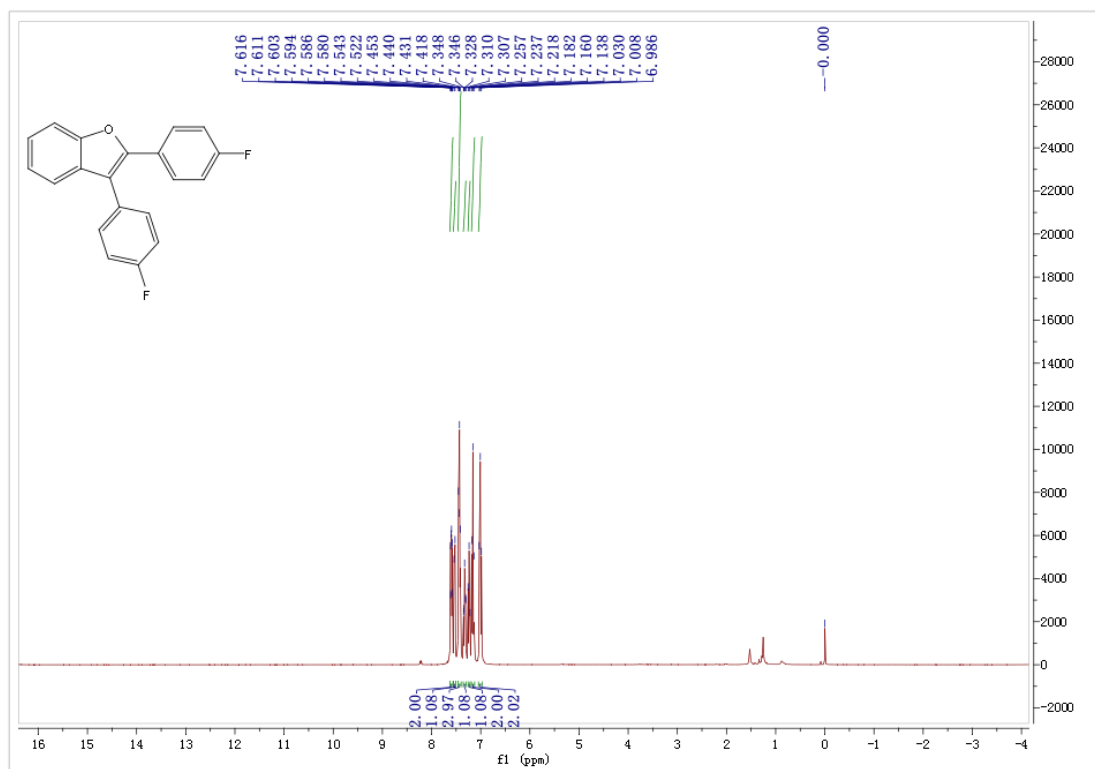

Fig. S-39.  $^1\text{H-NMR}$  spectrum of 4d.

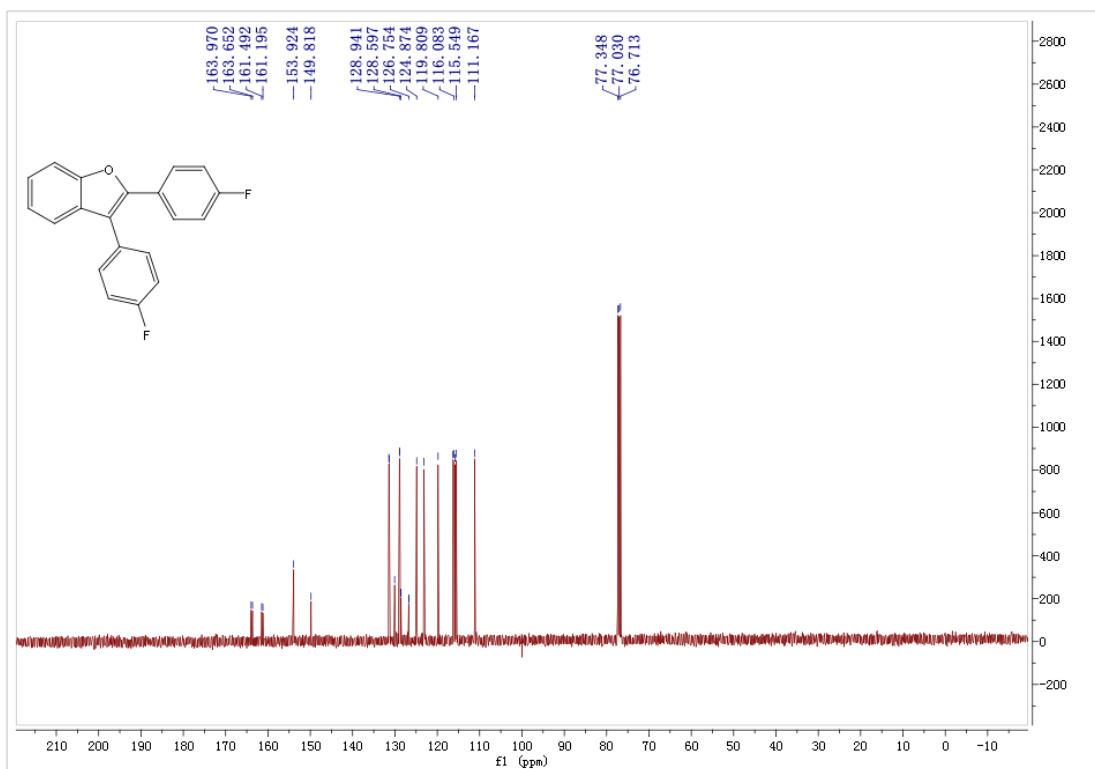

Fig. S-40.  $^{13}\text{C-NMR}$  spectrum of 4d.

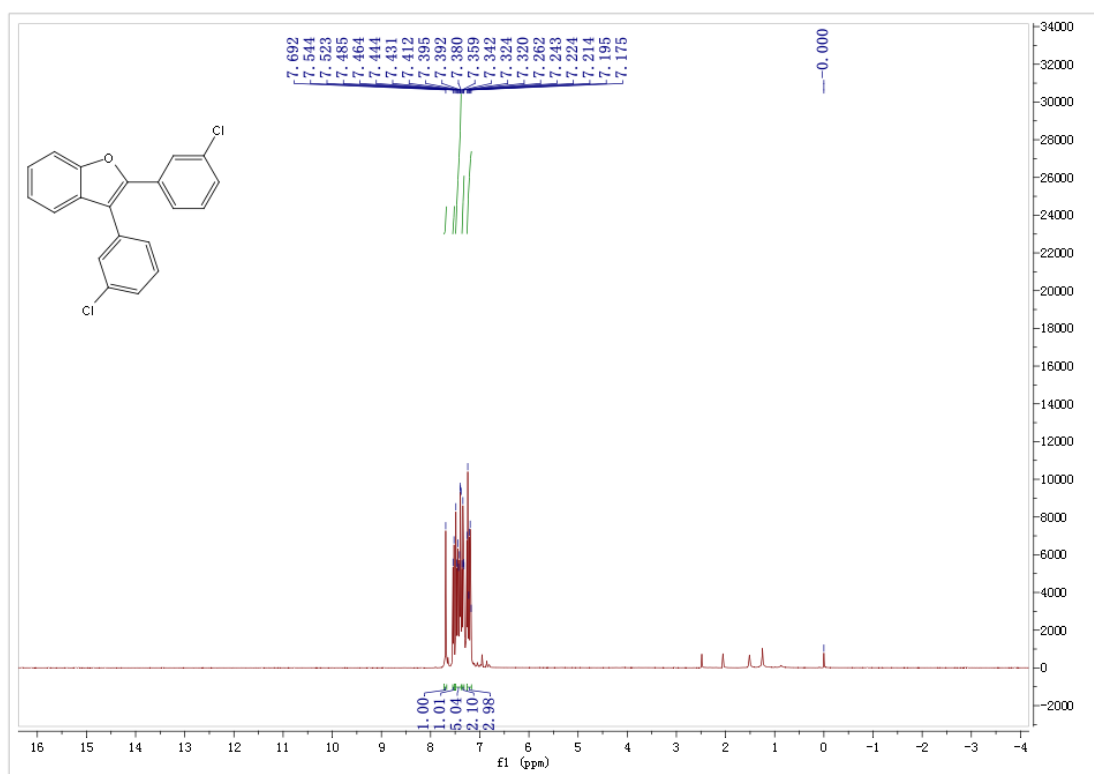

Fig. S-41.  $^1\text{H-NMR}$  spectrum of 4e.

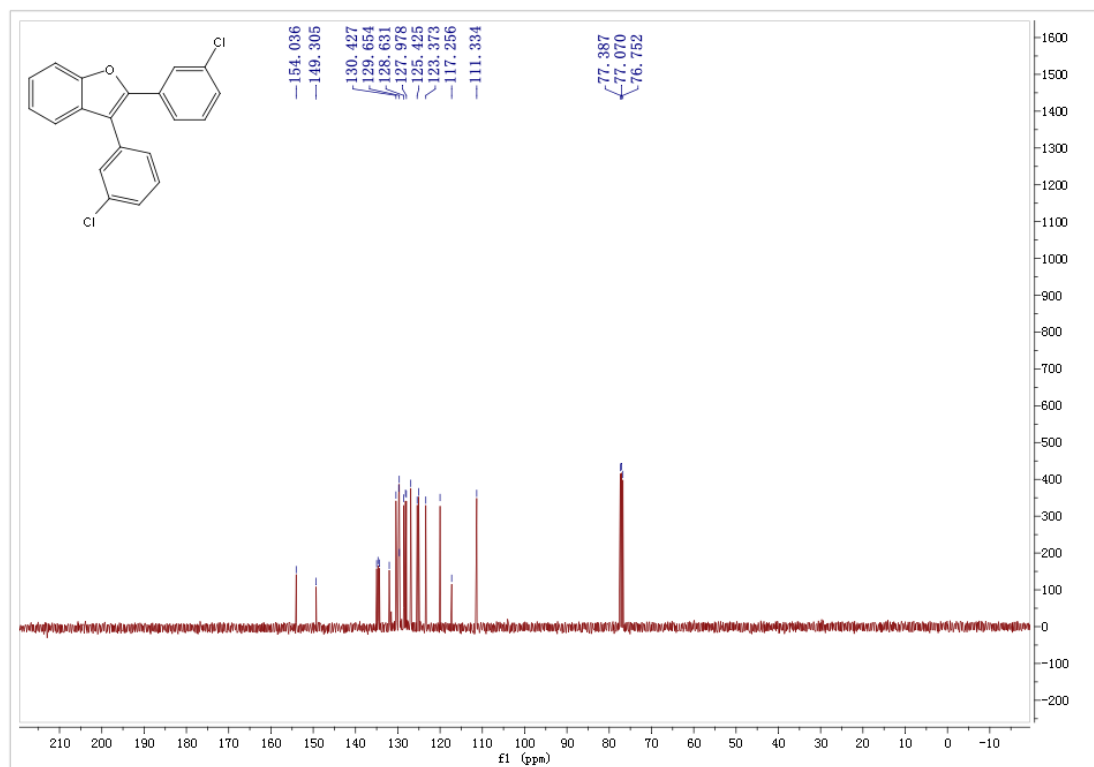

Fig. S-42.  $^{13}\text{C-NMR}$  spectrum of 4e.

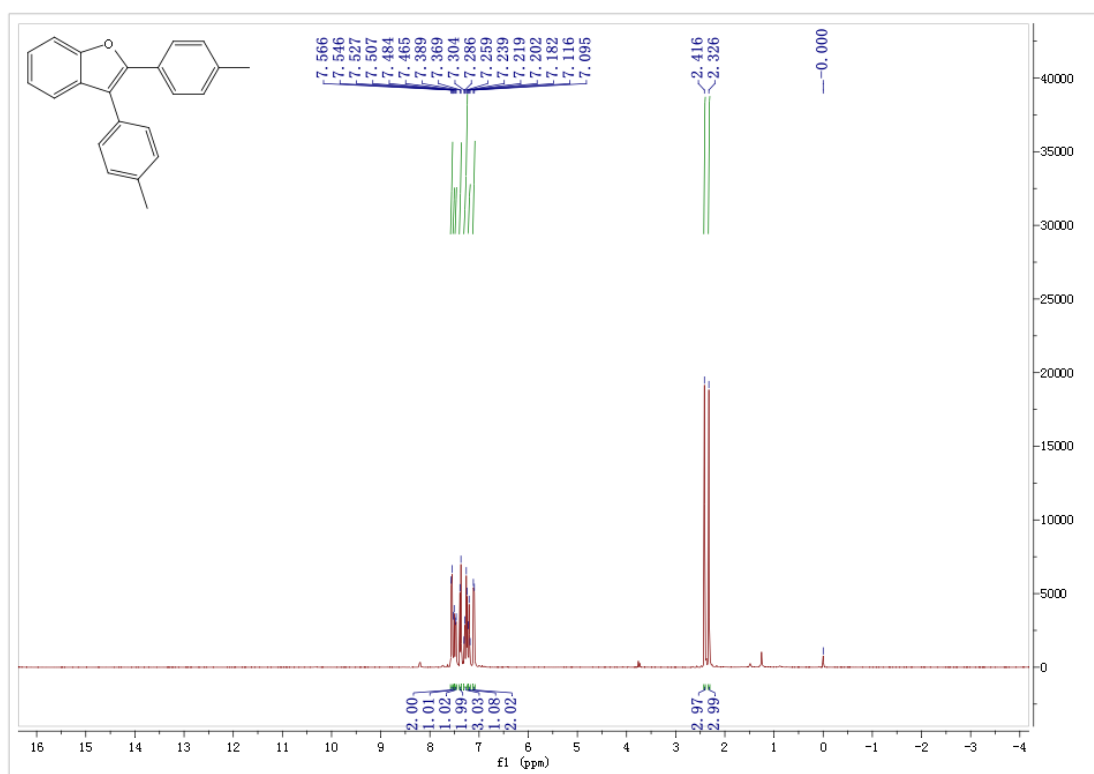

Fig. S-43.  $^1\text{H-NMR}$  spectrum of **4f**.

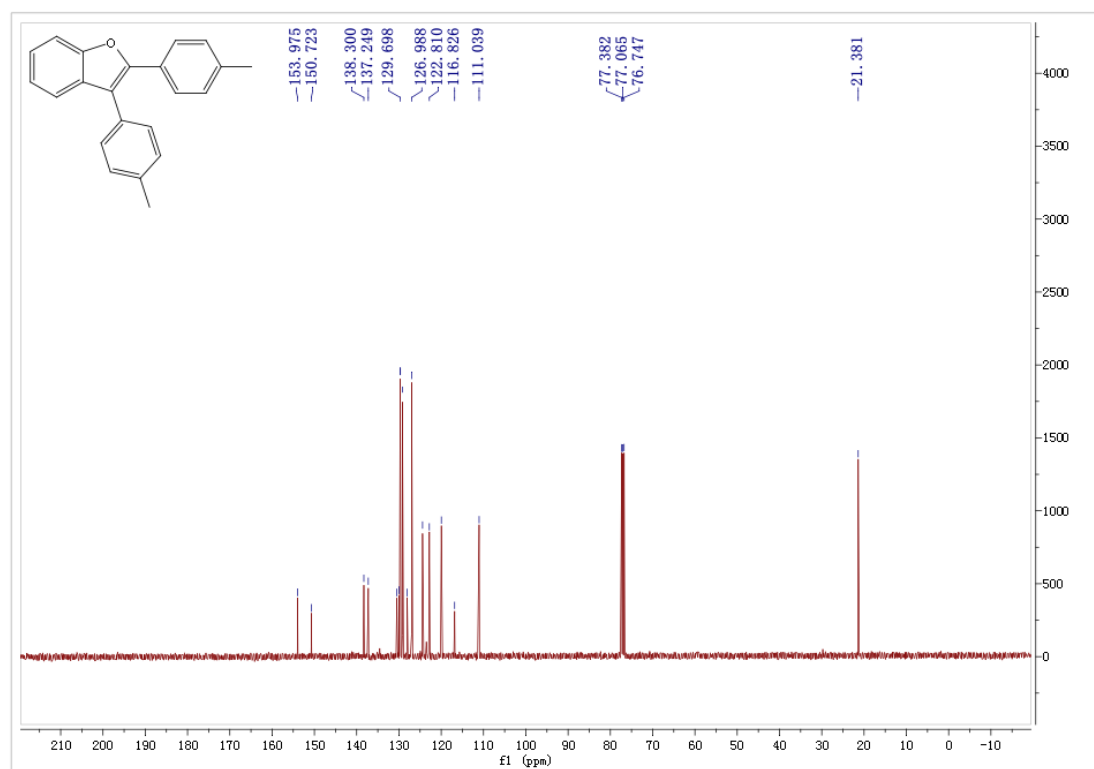

Fig. S-44.  $^{13}\text{C-NMR}$  spectrum of **4f**.

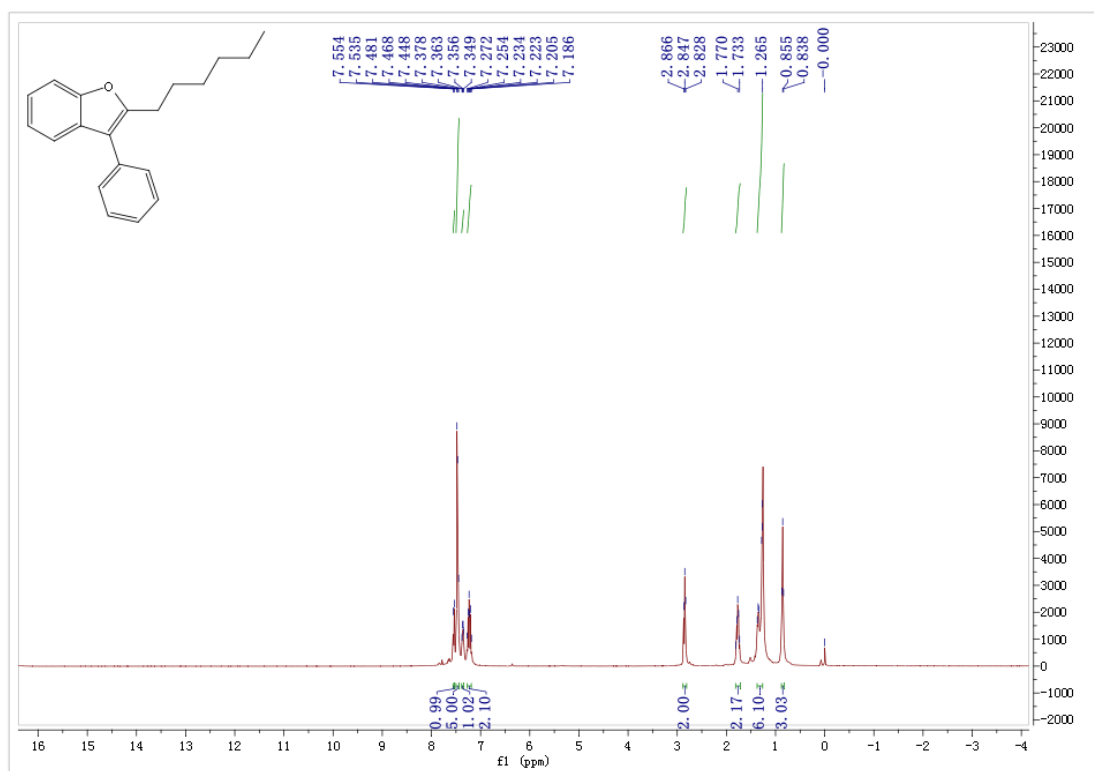

**Fig. S-45.** <sup>1</sup>H-NMR spectrum of **4g**.

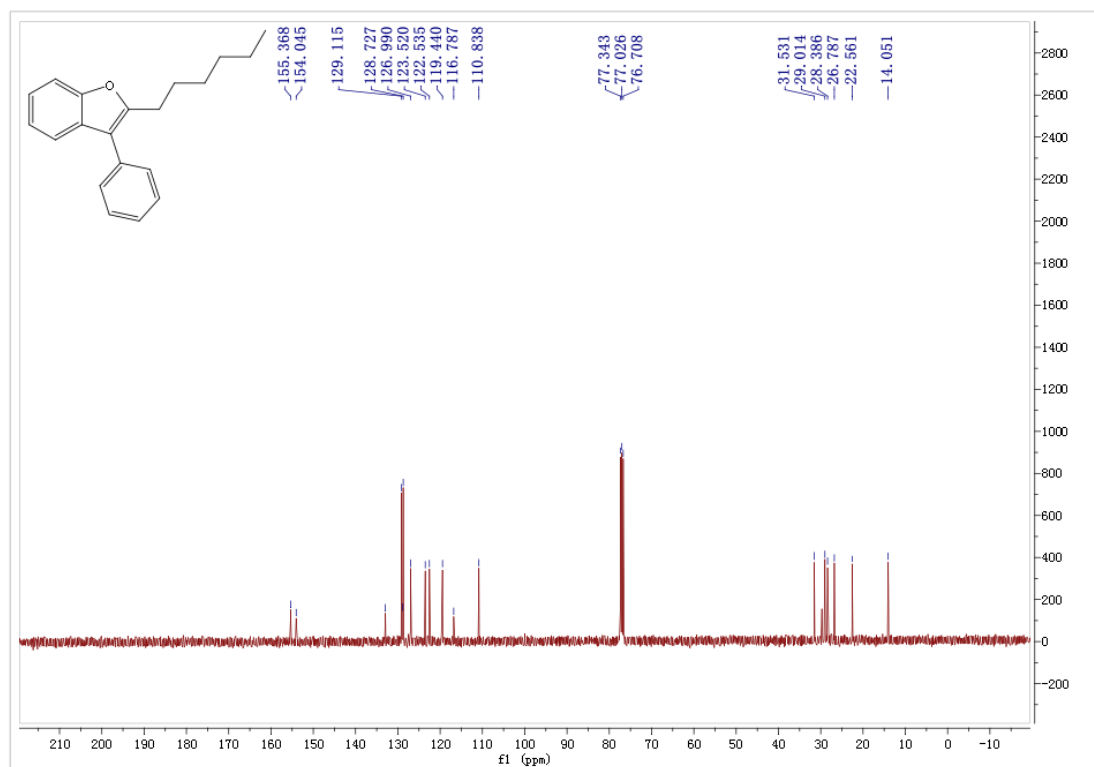

**Fig. S-46.** <sup>13</sup>C-NMR spectrum of **4g**.

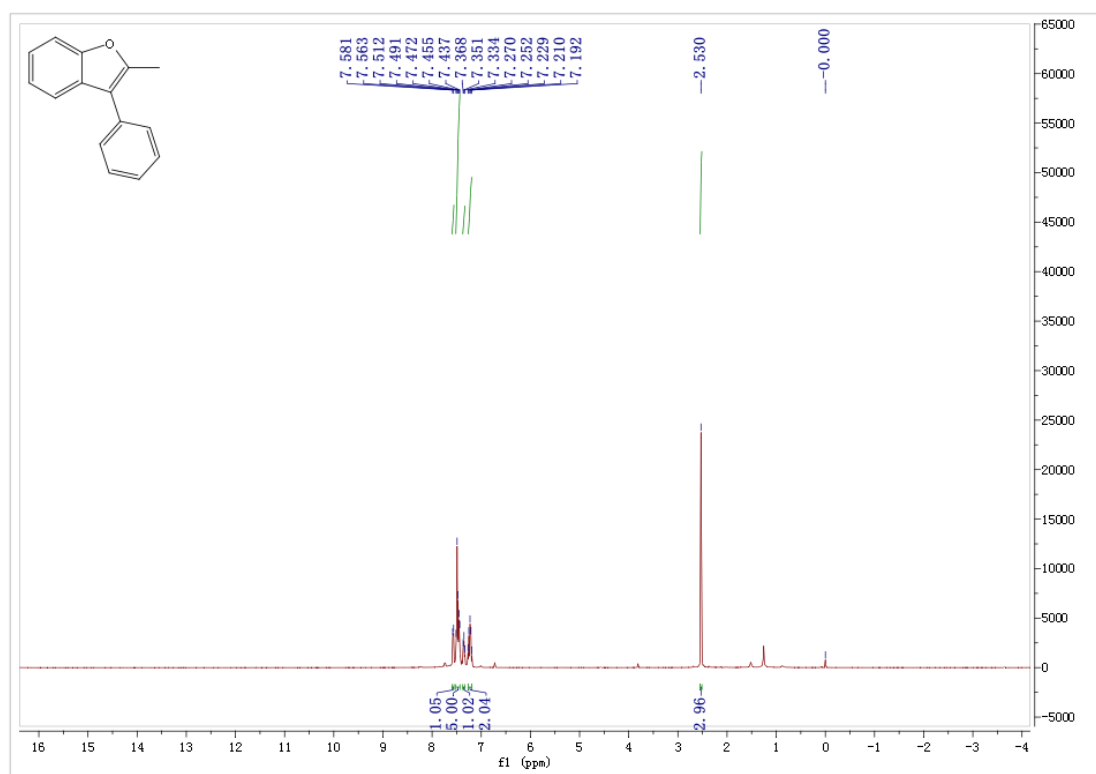

Fig. S-47.  $^1\text{H-NMR}$  spectrum of 4h.

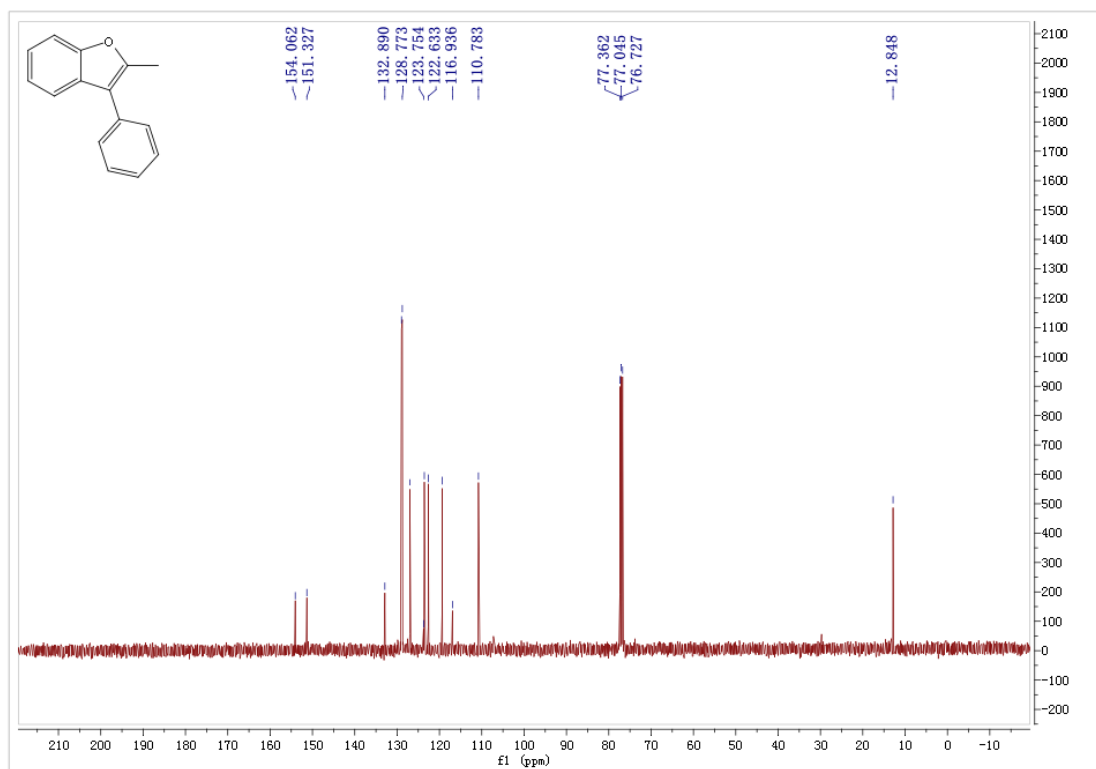

Fig. S-48.  $^{13}\text{C-NMR}$  spectrum of 4h.

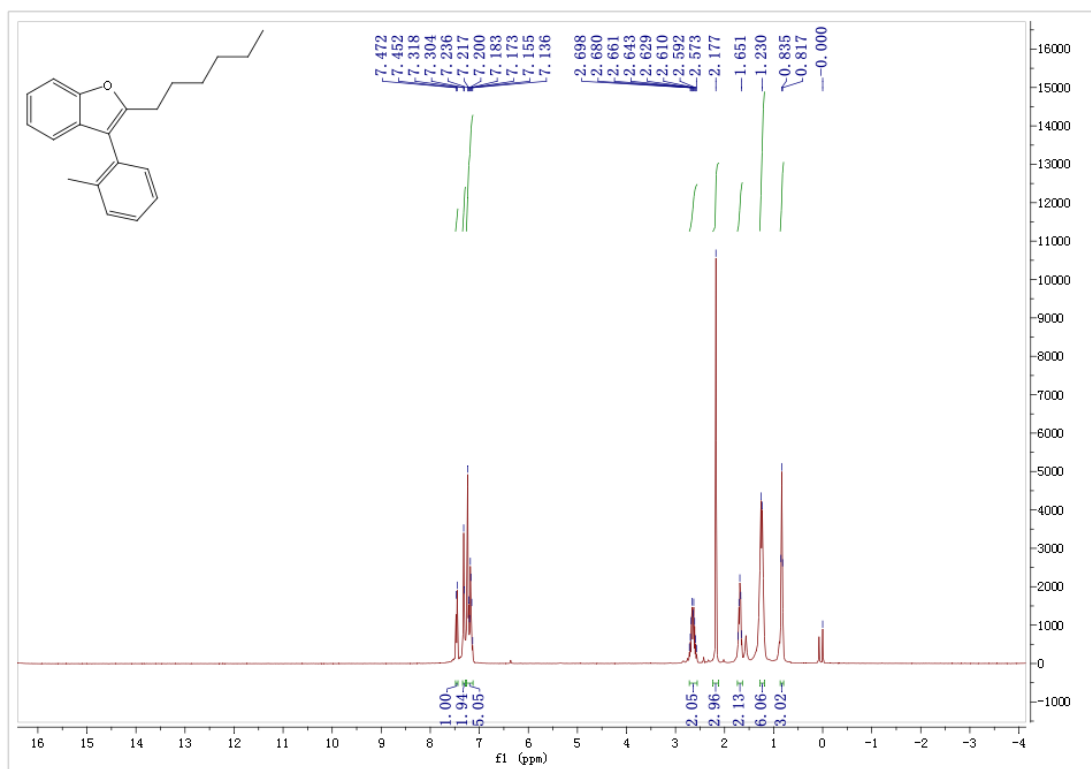

Fig. S-49.  $^1\text{H-NMR}$  spectrum of 4i.

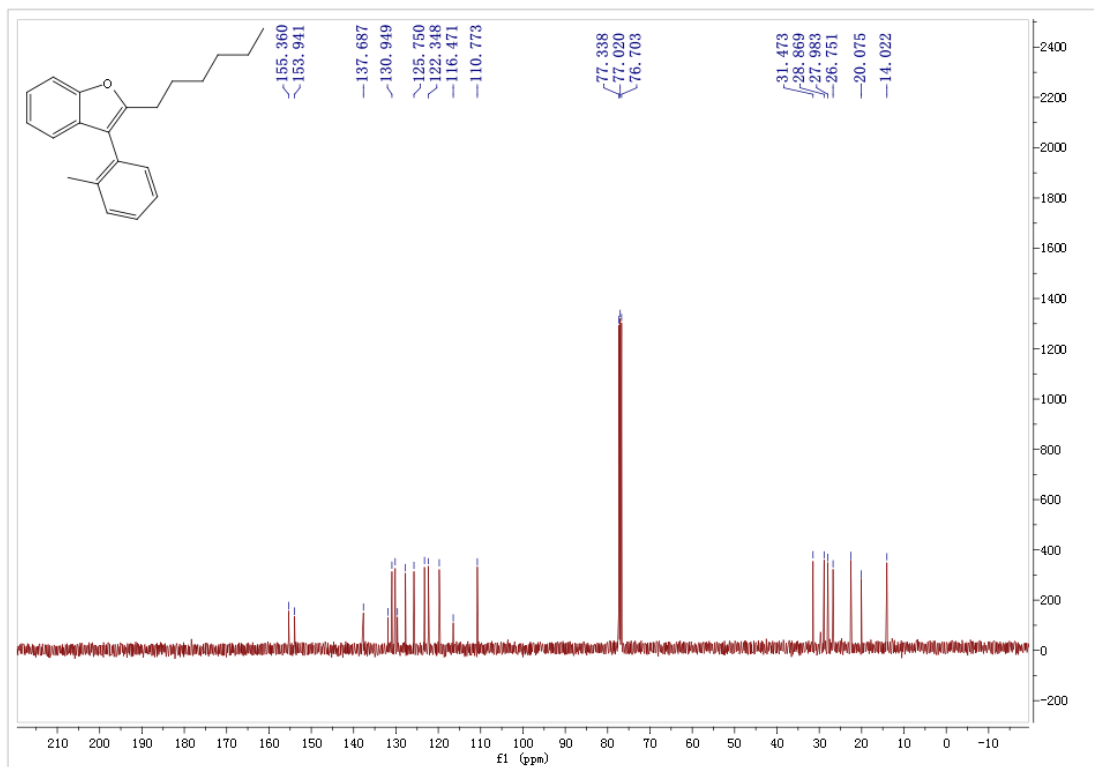

Fig. S-50.  $^{13}\text{C-NMR}$  spectrum of 4i.

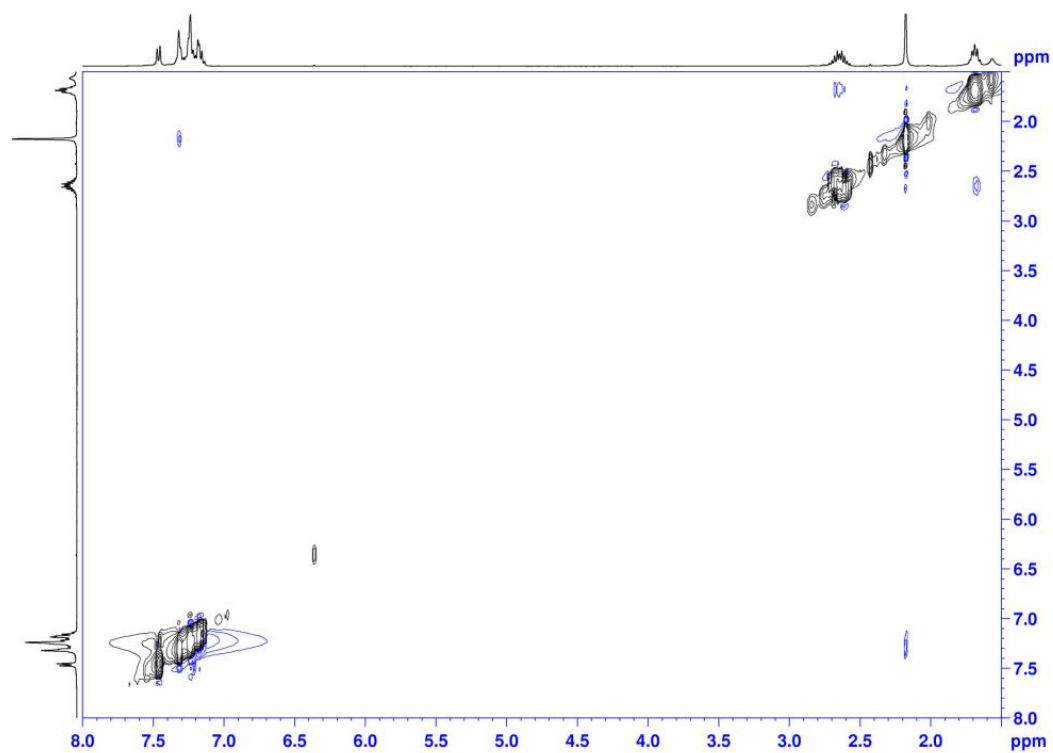

**Fig. S-51.** NOESY Spectrum for Compound **4i**
